# Supplementary material for: Macrostylis metallicola spec. nov.—an isopod with geographically clustered genetic variability from a polymetallic-nodule area in the Clarion-Clipperton Fracture Zone
Source: PeerJ. 2020 Feb 27;8:e8621. doi: 10.7717/peerj.8621 (PMC7049464; doi:10.7717/peerj.8621)
Supplement: Supplemental Information 1 — Specimen collection, sequencing and publishing information of the 16S sequences collected from GenBank. [file peerj-08-8621-s001.xlsx]

## Sheet: Tabelle1
Name	Family	GENUS	ORGANISM	SPECVOUCH	CAMPAIGN	STATION	LATDEC	LONDEC	DEPTH	OCEAN	GEOGR AREA	LOCALITY	PUBL: PUBL
MN608519	Macrostylidae	Macrostylis	Macrostylis metallicola	Mmetalli_1089	GSRNOD15A	BC012-GEO	13.8983	-123.282	4586	Pacific Ocean: CCFZ	central East Pacific Abyssal Plain; Clarion-Clipperton Fracture Zone; GSR exploration area	GSR exploration area B6 site S02	Riehl, Torben & Bart De Smet. Macrostylis metallicola spec. nov. - An isopod with geographically clustered genetic variability from a polymetallic-nodules area in the Clarion-Clipperton Fracture Zone
MN608524	Macrostylidae	Macrostylis	Macrostylis metallicola	Mmetalli_273	GSRNOD15A	BC015-BIO	13.8832	-123.282	4560	Pacific Ocean: CCFZ	central East Pacific Abyssal Plain; Clarion-Clipperton Fracture Zone; GSR exploration area	GSR exploration area B6 site S02	Riehl, Torben & Bart De Smet. Macrostylis metallicola spec. nov. - An isopod with geographically clustered genetic variability from a polymetallic-nodules area in the Clarion-Clipperton Fracture Zone
MN608523	Macrostylidae	Macrostylis	Macrostylis metallicola	Mmetalli_301	GSRNOD15A	BC018-BIO	14.1125	-125.871	4501	Pacific Ocean: CCFZ	central East Pacific Abyssal Plain; Clarion-Clipperton Fracture Zone; GSR exploration area	GSR exploration area B4 site S03	Riehl, Torben & Bart De Smet. Macrostylis metallicola spec. nov. - An isopod with geographically clustered genetic variability from a polymetallic-nodules area in the Clarion-Clipperton Fracture Zone
MN608521	Macrostylidae	Macrostylis	Macrostylis metallicola	Mmetalli_824	GSRNOD15A	BC024-BIO	14.0556	-125.926	4569	Pacific Ocean: CCFZ	central East Pacific Abyssal Plain; Clarion-Clipperton Fracture Zone; GSR exploration area	GSR exploration area B4 site S03	Riehl, Torben & Bart De Smet. Macrostylis metallicola spec. nov. - An isopod with geographically clustered genetic variability from a polymetallic-nodules area in the Clarion-Clipperton Fracture Zone
MN608518	Macrostylidae	Macrostylis	Macrostylis metallicola	Mmetalli_1242	GSRNOD15A	BC025-GEO	14.0356	-125.925	4544	Pacific Ocean: CCFZ	central East Pacific Abyssal Plain; Clarion-Clipperton Fracture Zone; GSR exploration area	GSR exploration area B4 site N01	Riehl, Torben & Bart De Smet. Macrostylis metallicola spec. nov. - An isopod with geographically clustered genetic variability from a polymetallic-nodules area in the Clarion-Clipperton Fracture Zone
MN608522	Macrostylidae	Macrostylis	Macrostylis metallicola	Mmetalli_575	GSRNOD15A	BC029-BIO	14.7064	-125.452	4504	Pacific Ocean: CCFZ	central East Pacific Abyssal Plain; Clarion-Clipperton Fracture Zone; GSR exploration area	GSR exploration area B4 site N01	Riehl, Torben & Bart De Smet. Macrostylis metallicola spec. nov. - An isopod with geographically clustered genetic variability from a polymetallic-nodules area in the Clarion-Clipperton Fracture Zone
MN608525	Macrostylidae	Macrostylis	Macrostylis metallicola	Mmetalli_879	GSRNOD15A	BC035-BIO	14.6474	-125.409	4505	Pacific Ocean: CCFZ	central East Pacific Abyssal Plain; Clarion-Clipperton Fracture Zone; GSR exploration area	GSR exploration area B4 site N01	Riehl, Torben & Bart De Smet. Macrostylis metallicola spec. nov. - An isopod with geographically clustered genetic variability from a polymetallic-nodules area in the Clarion-Clipperton Fracture Zone
MN608520	Macrostylidae	Macrostylis	Macrostylis metallicola	Mmetalli_959	GSRNOD15A	BC036-BIO	14.6715	-125.456	4514	Pacific Ocean: CCFZ	central East Pacific Abyssal Plain; Clarion-Clipperton Fracture Zone; GSR exploration area	GSR exploration area B4 site N01	Riehl, Torben & Bart De Smet. Macrostylis metallicola spec. nov. - An isopod with geographically clustered genetic variability from a polymetallic-nodules area in the Clarion-Clipperton Fracture Zone
JX260340	Macrostylidae	Macrostylis	Macrostylis roaldi	BMa9	BIOPEARL II	BIO03-EBS-1B	-71.7915	-106.214	577.67	Southern Ocean: Pacific Sector, Amundsen Sea, Pine Island Bay	Amundsen Sea, Pine Island Bay	Pine Island Bay	Riehl T, Kaiser S (2012) Conquered from the deep sea? A new deep-sea isopod species from the Antarctic shelf shows pattern of recent colonization. PLoS ONE 7:e49354. doi: 10.1371/journal.pone.0049354
JX260341	Macrostylidae	Macrostylis	Macrostylis roaldi	BMa8	BIOPEARL II	BIO03-EBS-1B	-71.7915	-106.214	577.67	Southern Ocean: Pacific Sector, Amundsen Sea, Pine Island Bay	Amundsen Sea, Pine Island Bay	Pine Island Bay	Riehl T, Kaiser S (2012) Conquered from the deep sea? A new deep-sea isopod species from the Antarctic shelf shows pattern of recent colonization. PLoS ONE 7:e49354. doi: 10.1371/journal.pone.0049354
JX260342	Macrostylidae	Macrostylis	Macrostylis roaldi	BMa7	BIOPEARL II	BIO03-EBS-1B	-71.7915	-106.214	577.67	Southern Ocean: Pacific Sector, Amundsen Sea, Pine Island Bay	Amundsen Sea, Pine Island Bay	Pine Island Bay	Riehl T, Kaiser S (2012) Conquered from the deep sea? A new deep-sea isopod species from the Antarctic shelf shows pattern of recent colonization. PLoS ONE 7:e49354. doi: 10.1371/journal.pone.0049354
JX260321	Macrostylidae	Macrostylis	Macrostylis roaldi	BMa24	BIOPEARL II	BIO04-EBS-1A	-74.3598	-104.746	1414.29	Southern Ocean: Pacific Sector, Amundsen Sea, Pine Island Bay	Amundsen Sea, Pine Island Bay	Pine Island Bay	Riehl T, Kaiser S (2012) Conquered from the deep sea? A new deep-sea isopod species from the Antarctic shelf shows pattern of recent colonization. PLoS ONE 7:e49354. doi: 10.1371/journal.pone.0049354
JX260322	Macrostylidae	Macrostylis	Macrostylis roaldi	BMa23	BIOPEARL II	BIO04-EBS-1A	-74.3598	-104.746	1414.29	Southern Ocean: Pacific Sector, Amundsen Sea, Pine Island Bay	Amundsen Sea, Pine Island Bay	Pine Island Bay	Riehl T, Kaiser S (2012) Conquered from the deep sea? A new deep-sea isopod species from the Antarctic shelf shows pattern of recent colonization. PLoS ONE 7:e49354. doi: 10.1371/journal.pone.0049354
JX260323	Macrostylidae	Macrostylis	Macrostylis roaldi	BMa21	BIOPEARL II	BIO04-EBS-1A	-74.3598	-104.746	1414.29	Southern Ocean: Pacific Sector, Amundsen Sea, Pine Island Bay	Amundsen Sea, Pine Island Bay	Pine Island Bay	Riehl T, Kaiser S (2012) Conquered from the deep sea? A new deep-sea isopod species from the Antarctic shelf shows pattern of recent colonization. PLoS ONE 7:e49354. doi: 10.1371/journal.pone.0049354
JX260324	Macrostylidae	Macrostylis	Macrostylis roaldi	BMa20	BIOPEARL II	BIO04-EBS-1A	-74.3598	-104.746	1414.29	Southern Ocean: Pacific Sector, Amundsen Sea, Pine Island Bay	Amundsen Sea, Pine Island Bay	Pine Island Bay	Riehl T, Kaiser S (2012) Conquered from the deep sea? A new deep-sea isopod species from the Antarctic shelf shows pattern of recent colonization. PLoS ONE 7:e49354. doi: 10.1371/journal.pone.0049354
JX260325	Macrostylidae	Macrostylis	Macrostylis roaldi	BMa19	BIOPEARL II	BIO04-EBS-1A	-74.3598	-104.746	1414.29	Southern Ocean: Pacific Sector, Amundsen Sea, Pine Island Bay	Amundsen Sea, Pine Island Bay	Pine Island Bay	Riehl T, Kaiser S (2012) Conquered from the deep sea? A new deep-sea isopod species from the Antarctic shelf shows pattern of recent colonization. PLoS ONE 7:e49354. doi: 10.1371/journal.pone.0049354
JX260326	Macrostylidae	Macrostylis	Macrostylis roaldi	BMa18j	BIOPEARL II	BIO04-EBS-1A	-74.3598	-104.746	1414.29	Southern Ocean: Pacific Sector, Amundsen Sea, Pine Island Bay	Amundsen Sea, Pine Island Bay	Pine Island Bay	Riehl T, Kaiser S (2012) Conquered from the deep sea? A new deep-sea isopod species from the Antarctic shelf shows pattern of recent colonization. PLoS ONE 7:e49354. doi: 10.1371/journal.pone.0049354
JX260327	Macrostylidae	Macrostylis	Macrostylis roaldi	BMa18i	BIOPEARL II	BIO04-EBS-1A	-74.3598	-104.746	1414.29	Southern Ocean: Pacific Sector, Amundsen Sea, Pine Island Bay	Amundsen Sea, Pine Island Bay	Pine Island Bay	Riehl T, Kaiser S (2012) Conquered from the deep sea? A new deep-sea isopod species from the Antarctic shelf shows pattern of recent colonization. PLoS ONE 7:e49354. doi: 10.1371/journal.pone.0049354
JX260328	Macrostylidae	Macrostylis	Macrostylis roaldi	BMa18h	BIOPEARL II	BIO04-EBS-1A	-74.3598	-104.746	1414.29	Southern Ocean: Pacific Sector, Amundsen Sea, Pine Island Bay	Amundsen Sea, Pine Island Bay	Pine Island Bay	Riehl T, Kaiser S (2012) Conquered from the deep sea? A new deep-sea isopod species from the Antarctic shelf shows pattern of recent colonization. PLoS ONE 7:e49354. doi: 10.1371/journal.pone.0049354
JX260329	Macrostylidae	Macrostylis	Macrostylis roaldi	BMa18g	BIOPEARL II	BIO04-EBS-1A	-74.3598	-104.746	1414.29	Southern Ocean: Pacific Sector, Amundsen Sea, Pine Island Bay	Amundsen Sea, Pine Island Bay	Pine Island Bay	Riehl T, Kaiser S (2012) Conquered from the deep sea? A new deep-sea isopod species from the Antarctic shelf shows pattern of recent colonization. PLoS ONE 7:e49354. doi: 10.1371/journal.pone.0049354
JX260330	Macrostylidae	Macrostylis	Macrostylis roaldi	BMa18f	BIOPEARL II	BIO04-EBS-1A	-74.3598	-104.746	1414.29	Southern Ocean: Pacific Sector, Amundsen Sea, Pine Island Bay	Amundsen Sea, Pine Island Bay	Pine Island Bay	Riehl T, Kaiser S (2012) Conquered from the deep sea? A new deep-sea isopod species from the Antarctic shelf shows pattern of recent colonization. PLoS ONE 7:e49354. doi: 10.1371/journal.pone.0049354
JX260331	Macrostylidae	Macrostylis	Macrostylis roaldi	BMa18d	BIOPEARL II	BIO04-EBS-1A	-74.3598	-104.746	1414.29	Southern Ocean: Pacific Sector, Amundsen Sea, Pine Island Bay	Amundsen Sea, Pine Island Bay	Pine Island Bay	Riehl T, Kaiser S (2012) Conquered from the deep sea? A new deep-sea isopod species from the Antarctic shelf shows pattern of recent colonization. PLoS ONE 7:e49354. doi: 10.1371/journal.pone.0049354
JX260332	Macrostylidae	Macrostylis	Macrostylis roaldi	BMa18c	BIOPEARL II	BIO04-EBS-1A	-74.3598	-104.746	1414.29	Southern Ocean: Pacific Sector, Amundsen Sea, Pine Island Bay	Amundsen Sea, Pine Island Bay	Pine Island Bay	Riehl T, Kaiser S (2012) Conquered from the deep sea? A new deep-sea isopod species from the Antarctic shelf shows pattern of recent colonization. PLoS ONE 7:e49354. doi: 10.1371/journal.pone.0049354
JX260333	Macrostylidae	Macrostylis	Macrostylis roaldi	BMa18b	BIOPEARL II	BIO04-EBS-1A	-74.3598	-104.746	1414.29	Southern Ocean: Pacific Sector, Amundsen Sea, Pine Island Bay	Amundsen Sea, Pine Island Bay	Pine Island Bay	Riehl T, Kaiser S (2012) Conquered from the deep sea? A new deep-sea isopod species from the Antarctic shelf shows pattern of recent colonization. PLoS ONE 7:e49354. doi: 10.1371/journal.pone.0049354
JX260334	Macrostylidae	Macrostylis	Macrostylis roaldi	BMa18	BIOPEARL II	BIO04-EBS-1A	-74.3598	-104.746	1414.29	Southern Ocean: Pacific Sector, Amundsen Sea, Pine Island Bay	Amundsen Sea, Pine Island Bay	Pine Island Bay	Riehl T, Kaiser S (2012) Conquered from the deep sea? A new deep-sea isopod species from the Antarctic shelf shows pattern of recent colonization. PLoS ONE 7:e49354. doi: 10.1371/journal.pone.0049354
JX260335	Macrostylidae	Macrostylis	Macrostylis roaldi	BMa17	BIOPEARL II	BIO04-EBS-1A	-74.3598	-104.746	1414.29	Southern Ocean: Pacific Sector, Amundsen Sea, Pine Island Bay	Amundsen Sea, Pine Island Bay	Pine Island Bay	Riehl T, Kaiser S (2012) Conquered from the deep sea? A new deep-sea isopod species from the Antarctic shelf shows pattern of recent colonization. PLoS ONE 7:e49354. doi: 10.1371/journal.pone.0049354
JX260336	Macrostylidae	Macrostylis	Macrostylis roaldi	BMa16	BIOPEARL II	BIO04-EBS-1A	-74.3598	-104.746	1414.29	Southern Ocean: Pacific Sector, Amundsen Sea, Pine Island Bay	Amundsen Sea, Pine Island Bay	Pine Island Bay	Riehl T, Kaiser S (2012) Conquered from the deep sea? A new deep-sea isopod species from the Antarctic shelf shows pattern of recent colonization. PLoS ONE 7:e49354. doi: 10.1371/journal.pone.0049354
JX260337	Macrostylidae	Macrostylis	Macrostylis roaldi	BMa15	BIOPEARL II	BIO04-EBS-1A	-74.3598	-104.746	1414.29	Southern Ocean: Pacific Sector, Amundsen Sea, Pine Island Bay	Amundsen Sea, Pine Island Bay	Pine Island Bay	Riehl T, Kaiser S (2012) Conquered from the deep sea? A new deep-sea isopod species from the Antarctic shelf shows pattern of recent colonization. PLoS ONE 7:e49354. doi: 10.1371/journal.pone.0049354
JX260338	Macrostylidae	Macrostylis	Macrostylis roaldi	BMa14	BIOPEARL II	BIO04-EBS-1A	-74.3598	-104.746	1414.29	Southern Ocean: Pacific Sector, Amundsen Sea, Pine Island Bay	Amundsen Sea, Pine Island Bay	Pine Island Bay	Riehl T, Kaiser S (2012) Conquered from the deep sea? A new deep-sea isopod species from the Antarctic shelf shows pattern of recent colonization. PLoS ONE 7:e49354. doi: 10.1371/journal.pone.0049354
JX260339	Macrostylidae	Macrostylis	Macrostylis roaldi	BMa10	BIOPEARL II	BIO04-EBS-3A	-74.3984	-104.632	504.29	Southern Ocean: Pacific Sector, Amundsen Sea, Pine Island Bay	Amundsen Sea, Pine Island Bay	Pine Island Bay	Riehl T, Kaiser S (2012) Conquered from the deep sea? A new deep-sea isopod species from the Antarctic shelf shows pattern of recent colonization. PLoS ONE 7:e49354. doi: 10.1371/journal.pone.0049354
JX260314	Macrostylidae	Macrostylis	Macrostylis roaldi	BMa34	BIOPEARL II	BIO04-EBS-3B	-74.4023	-104.615	495.97	Southern Ocean: Pacific Sector, Amundsen Sea, Pine Island Bay	Amundsen Sea, Pine Island Bay	Pine Island Bay	Riehl T, Kaiser S (2012) Conquered from the deep sea? A new deep-sea isopod species from the Antarctic shelf shows pattern of recent colonization. PLoS ONE 7:e49354. doi: 10.1371/journal.pone.0049354
JX260315	Macrostylidae	Macrostylis	Macrostylis roaldi	BMa33	BIOPEARL II	BIO04-EBS-3B	-74.4023	-104.615	495.97	Southern Ocean: Pacific Sector, Amundsen Sea, Pine Island Bay	Amundsen Sea, Pine Island Bay	Pine Island Bay	Riehl T, Kaiser S (2012) Conquered from the deep sea? A new deep-sea isopod species from the Antarctic shelf shows pattern of recent colonization. PLoS ONE 7:e49354. doi: 10.1371/journal.pone.0049354
JX260316	Macrostylidae	Macrostylis	Macrostylis roaldi	BMa32	BIOPEARL II	BIO04-EBS-3B	-74.4023	-104.615	495.97	Southern Ocean: Pacific Sector, Amundsen Sea, Pine Island Bay	Amundsen Sea, Pine Island Bay	Pine Island Bay	Riehl T, Kaiser S (2012) Conquered from the deep sea? A new deep-sea isopod species from the Antarctic shelf shows pattern of recent colonization. PLoS ONE 7:e49354. doi: 10.1371/journal.pone.0049354
JX260317	Macrostylidae	Macrostylis	Macrostylis roaldi	BMa31	BIOPEARL II	BIO04-EBS-3B	-74.4023	-104.615	495.97	Southern Ocean: Pacific Sector, Amundsen Sea, Pine Island Bay	Amundsen Sea, Pine Island Bay	Pine Island Bay	Riehl T, Kaiser S (2012) Conquered from the deep sea? A new deep-sea isopod species from the Antarctic shelf shows pattern of recent colonization. PLoS ONE 7:e49354. doi: 10.1371/journal.pone.0049354
JX260318	Macrostylidae	Macrostylis	Macrostylis roaldi	BMa29	BIOPEARL II	BIO04-EBS-3B	-74.4023	-104.615	495.97	Southern Ocean: Pacific Sector, Amundsen Sea, Pine Island Bay	Amundsen Sea, Pine Island Bay	Pine Island Bay	Riehl T, Kaiser S (2012) Conquered from the deep sea? A new deep-sea isopod species from the Antarctic shelf shows pattern of recent colonization. PLoS ONE 7:e49354. doi: 10.1371/journal.pone.0049354
JX260319	Macrostylidae	Macrostylis	Macrostylis roaldi	BMa27	BIOPEARL II	BIO04-EBS-3B	-74.4023	-104.615	495.97	Southern Ocean: Pacific Sector, Amundsen Sea, Pine Island Bay	Amundsen Sea, Pine Island Bay	Pine Island Bay	Riehl T, Kaiser S (2012) Conquered from the deep sea? A new deep-sea isopod species from the Antarctic shelf shows pattern of recent colonization. PLoS ONE 7:e49354. doi: 10.1371/journal.pone.0049354
JX260320	Macrostylidae	Macrostylis	Macrostylis roaldi	BMa26	BIOPEARL II	BIO04-EBS-3B	-74.4023	-104.615	495.97	Southern Ocean: Pacific Sector, Amundsen Sea, Pine Island Bay	Amundsen Sea, Pine Island Bay	Pine Island Bay	Riehl T, Kaiser S (2012) Conquered from the deep sea? A new deep-sea isopod species from the Antarctic shelf shows pattern of recent colonization. PLoS ONE 7:e49354. doi: 10.1371/journal.pone.0049354
JX260345	Macrostylidae	Macrostylis	Macrostylis roaldi	BMa4	BIOPEARL II	BIO05-EBS-1A	-74.1182	-105.838	1478.92	Southern Ocean: Pacific Sector, Amundsen Sea, Pine Island Bay	Amundsen Sea, Pine Island Bay	Pine Island Bay	Riehl T, Kaiser S (2012) Conquered from the deep sea? A new deep-sea isopod species from the Antarctic shelf shows pattern of recent colonization. PLoS ONE 7:e49354. doi: 10.1371/journal.pone.0049354
JX260346	Macrostylidae	Macrostylis	Macrostylis roaldi	BMa3	BIOPEARL II	BIO05-EBS-1A	-74.1182	-105.838	1478.92	Southern Ocean: Pacific Sector, Amundsen Sea, Pine Island Bay	Amundsen Sea, Pine Island Bay	Pine Island Bay	Riehl T, Kaiser S (2012) Conquered from the deep sea? A new deep-sea isopod species from the Antarctic shelf shows pattern of recent colonization. PLoS ONE 7:e49354. doi: 10.1371/journal.pone.0049354
JX260347	Macrostylidae	Macrostylis	Macrostylis roaldi	BMa2	BIOPEARL II	BIO05-EBS-1A	-74.1182	-105.838	1478.92	Southern Ocean: Pacific Sector, Amundsen Sea, Pine Island Bay	Amundsen Sea, Pine Island Bay	Pine Island Bay	Riehl T, Kaiser S (2012) Conquered from the deep sea? A new deep-sea isopod species from the Antarctic shelf shows pattern of recent colonization. PLoS ONE 7:e49354. doi: 10.1371/journal.pone.0049354
JX260348	Macrostylidae	Macrostylis	Macrostylis roaldi	BMa1	BIOPEARL II	BIO05-EBS-2A	-73.8802	-106.317	1045.85	Southern Ocean: Pacific Sector, Amundsen Sea, Pine Island Bay	Amundsen Sea, Pine Island Bay	Pine Island Bay	Riehl T, Kaiser S (2012) Conquered from the deep sea? A new deep-sea isopod species from the Antarctic shelf shows pattern of recent colonization. PLoS ONE 7:e49354. doi: 10.1371/journal.pone.0049354
JX260343	Macrostylidae	Macrostylis	Macrostylis roaldi	BMa6	BIOPEARL II	BIO05-EBS-3B	-73.9769	-107.41	551.7	Southern Ocean: Pacific Sector, Amundsen Sea, Pine Island Bay	Amundsen Sea, Pine Island Bay	Pine Island Bay	Riehl T, Kaiser S (2012) Conquered from the deep sea? A new deep-sea isopod species from the Antarctic shelf shows pattern of recent colonization. PLoS ONE 7:e49354. doi: 10.1371/journal.pone.0049354
JX260344	Macrostylidae	Macrostylis	Macrostylis roaldi	BMa5	BIOPEARL II	BIO05-EBS-3B	-73.9769	-107.41	551.7	Southern Ocean: Pacific Sector, Amundsen Sea, Pine Island Bay	Amundsen Sea, Pine Island Bay	Pine Island Bay	Riehl T, Kaiser S (2012) Conquered from the deep sea? A new deep-sea isopod species from the Antarctic shelf shows pattern of recent colonization. PLoS ONE 7:e49354. doi: 10.1371/journal.pone.0049354
KJ578663	Desmosomatidae	Chelator	Chelator aequabilis	D2D051	DIVA-2	M63/2-89-6	0.715933	-5.52157	5142	South Atlantic	Guinea Basin		Brix, S., Leese, F., Riehl, T., Kihara, T.C., 2015. A new genus and new species of Desmosomatidae Sars, 1897 (Isopoda) from the eastern South Atlantic abyss described by means of integrative taxonomy. Mar Biodiv 45, 7â€“61. https://doi.org/10.1007/s12526-014-0218-3
KC715781	Macrostylidae	Macrostylis	Macrostylis sp. n. SYSTCO 4	SMa67c	ANDEEP-SYSTCO	PS71/013-16 (ANTXXIV-2)	-52.0483	-0.0148333	2996	Southern Ocean	Lazarev Sea	South Polar Front	Riehl, T., Brandt, A., 2013. Southern Ocean Macrostylidae reviewed with a key to the species and new descriptions from Maud Rise. Zootaxa 3692, 160â€“203. http://dx.doi.org/10.11646/zootaxa.3692.1.10
KC715782	Macrostylidae	Macrostylis	Macrostylis sp. n. SYSTCO 3	SMa69c	ANDEEP-SYSTCO	PS71/013-16 (ANTXXIV-2)	-52.0483	-0.0148333	2996	Southern Ocean	Lazarev Sea	South Polar Front	Riehl, T., Brandt, A., 2013. Southern Ocean Macrostylidae reviewed with a key to the species and new descriptions from Maud Rise. Zootaxa 3692, 160â€“203. http://dx.doi.org/10.11646/zootaxa.3692.1.10
KC715783	Macrostylidae	Macrostylis	Macrostylis sp. n. SYSTCO 4	SMa70c	ANDEEP-SYSTCO	PS71/013-16 (ANTXXIV-2)	-52.0483	-0.0148333	2996	Southern Ocean	Lazarev Sea	South Polar Front	Riehl, T., Brandt, A., 2013. Southern Ocean Macrostylidae reviewed with a key to the species and new descriptions from Maud Rise. Zootaxa 3692, 160â€“203. http://dx.doi.org/10.11646/zootaxa.3692.1.10
KC715761	Macrostylidae	Macrostylis	Macrostylis matildae	SMa23	ANDEEP-SYSTCO	PS71/039-17 (ANTXXIV-2)	-64.4795	2.87817	2152	Southern Ocean	Lazarev Sea	Maud Rise	Riehl, T., Brandt, A., 2013. Southern Ocean Macrostylidae reviewed with a key to the species and new descriptions from Maud Rise. Zootaxa 3692, 160â€“203. http://dx.doi.org/10.11646/zootaxa.3692.1.10
KC715762	Macrostylidae	Macrostylis	Macrostylis matildae	SMa25	ANDEEP-SYSTCO	PS71/039-17 (ANTXXIV-2)	-64.4795	2.87817	2152	Southern Ocean	Lazarev Sea	Maud Rise	Riehl, T., Brandt, A., 2013. Southern Ocean Macrostylidae reviewed with a key to the species and new descriptions from Maud Rise. Zootaxa 3692, 160â€“203. http://dx.doi.org/10.11646/zootaxa.3692.1.10
KC715763	Macrostylidae	Macrostylis	Macrostylis matildae	SMa26	ANDEEP-SYSTCO	PS71/039-17 (ANTXXIV-2)	-64.4795	2.87817	2152	Southern Ocean	Lazarev Sea	Maud Rise	Riehl, T., Brandt, A., 2013. Southern Ocean Macrostylidae reviewed with a key to the species and new descriptions from Maud Rise. Zootaxa 3692, 160â€“203. http://dx.doi.org/10.11646/zootaxa.3692.1.10
KC715764	Macrostylidae	Macrostylis	Macrostylis matildae	SMa27	ANDEEP-SYSTCO	PS71/039-17 (ANTXXIV-2)	-64.4795	2.87817	2152	Southern Ocean	Lazarev Sea	Maud Rise	Riehl, T., Brandt, A., 2013. Southern Ocean Macrostylidae reviewed with a key to the species and new descriptions from Maud Rise. Zootaxa 3692, 160â€“203. http://dx.doi.org/10.11646/zootaxa.3692.1.10
KC715765	Macrostylidae	Macrostylis	Macrostylis matildae	SMa28	ANDEEP-SYSTCO	PS71/039-17 (ANTXXIV-2)	-64.4795	2.87817	2152	Southern Ocean	Lazarev Sea	Maud Rise	Riehl, T., Brandt, A., 2013. Southern Ocean Macrostylidae reviewed with a key to the species and new descriptions from Maud Rise. Zootaxa 3692, 160â€“203. http://dx.doi.org/10.11646/zootaxa.3692.1.10
KC715766	Macrostylidae	Macrostylis	Macrostylis matildae	SMa30	ANDEEP-SYSTCO	PS71/039-17 (ANTXXIV-2)	-64.4795	2.87817	2152	Southern Ocean	Lazarev Sea	Maud Rise	Riehl, T., Brandt, A., 2013. Southern Ocean Macrostylidae reviewed with a key to the species and new descriptions from Maud Rise. Zootaxa 3692, 160â€“203. http://dx.doi.org/10.11646/zootaxa.3692.1.10
KC715767	Macrostylidae	Macrostylis	Macrostylis matildae	SMa32	ANDEEP-SYSTCO	PS71/039-17 (ANTXXIV-2)	-64.4795	2.87817	2152	Southern Ocean	Lazarev Sea	Maud Rise	Riehl, T., Brandt, A., 2013. Southern Ocean Macrostylidae reviewed with a key to the species and new descriptions from Maud Rise. Zootaxa 3692, 160â€“203. http://dx.doi.org/10.11646/zootaxa.3692.1.10
KC715768	Macrostylidae	Macrostylis	Macrostylis matildae	SMa33	ANDEEP-SYSTCO	PS71/039-17 (ANTXXIV-2)	-64.4795	2.87817	2152	Southern Ocean	Lazarev Sea	Maud Rise	Riehl, T., Brandt, A., 2013. Southern Ocean Macrostylidae reviewed with a key to the species and new descriptions from Maud Rise. Zootaxa 3692, 160â€“203. http://dx.doi.org/10.11646/zootaxa.3692.1.10
KC715769	Macrostylidae	Macrostylis	Macrostylis scotti	SMa34	ANDEEP-SYSTCO	PS71/039-17 (ANTXXIV-2)	-64.4795	2.87817	2152	Southern Ocean	Lazarev Sea	Maud Rise	Riehl, T., Brandt, A., 2013. Southern Ocean Macrostylidae reviewed with a key to the species and new descriptions from Maud Rise. Zootaxa 3692, 160â€“203. http://dx.doi.org/10.11646/zootaxa.3692.1.10
KC715770	Macrostylidae	Macrostylis	Macrostylis matildae	SMa43c	ANDEEP-SYSTCO	PS71/039-17 (ANTXXIV-2)	-64.4795	2.87817	2152	Southern Ocean	Lazarev Sea	Maud Rise	Riehl, T., Brandt, A., 2013. Southern Ocean Macrostylidae reviewed with a key to the species and new descriptions from Maud Rise. Zootaxa 3692, 160â€“203. http://dx.doi.org/10.11646/zootaxa.3692.1.10
KC715771	Macrostylidae	Macrostylis	Macrostylis matildae	SMa44c	ANDEEP-SYSTCO	PS71/039-17 (ANTXXIV-2)	-64.4795	2.87817	2152	Southern Ocean	Lazarev Sea	Maud Rise	Riehl, T., Brandt, A., 2013. Southern Ocean Macrostylidae reviewed with a key to the species and new descriptions from Maud Rise. Zootaxa 3692, 160â€“203. http://dx.doi.org/10.11646/zootaxa.3692.1.10
KC715772	Macrostylidae	Macrostylis	Macrostylis matildae	SMa45c	ANDEEP-SYSTCO	PS71/039-17 (ANTXXIV-2)	-64.4795	2.87817	2152	Southern Ocean	Lazarev Sea	Maud Rise	Riehl, T., Brandt, A., 2013. Southern Ocean Macrostylidae reviewed with a key to the species and new descriptions from Maud Rise. Zootaxa 3692, 160â€“203. http://dx.doi.org/10.11646/zootaxa.3692.1.10
KC715773	Macrostylidae	Macrostylis	Macrostylis matildae	SMa46c	ANDEEP-SYSTCO	PS71/039-17 (ANTXXIV-2)	-64.4795	2.87817	2152	Southern Ocean	Lazarev Sea	Maud Rise	Riehl, T., Brandt, A., 2013. Southern Ocean Macrostylidae reviewed with a key to the species and new descriptions from Maud Rise. Zootaxa 3692, 160â€“203. http://dx.doi.org/10.11646/zootaxa.3692.1.10
KC715774	Macrostylidae	Macrostylis	Macrostylis matildae	SMa47c	ANDEEP-SYSTCO	PS71/039-17 (ANTXXIV-2)	-64.4795	2.87817	2152	Southern Ocean	Lazarev Sea	Maud Rise	Riehl, T., Brandt, A., 2013. Southern Ocean Macrostylidae reviewed with a key to the species and new descriptions from Maud Rise. Zootaxa 3692, 160â€“203. http://dx.doi.org/10.11646/zootaxa.3692.1.10
KC715775	Macrostylidae	Macrostylis	Macrostylis matildae	SMa48c	ANDEEP-SYSTCO	PS71/039-17 (ANTXXIV-2)	-64.4795	2.87817	2152	Southern Ocean	Lazarev Sea	Maud Rise	Riehl, T., Brandt, A., 2013. Southern Ocean Macrostylidae reviewed with a key to the species and new descriptions from Maud Rise. Zootaxa 3692, 160â€“203. http://dx.doi.org/10.11646/zootaxa.3692.1.10
KC715777	Macrostylidae	Macrostylis	Macrostylis matildae	SMa61c	ANDEEP-SYSTCO	PS71/039-17 (ANTXXIV-2)	-64.4795	2.87817	2152	Southern Ocean	Lazarev Sea	Maud Rise	Riehl, T., Brandt, A., 2013. Southern Ocean Macrostylidae reviewed with a key to the species and new descriptions from Maud Rise. Zootaxa 3692, 160â€“203. http://dx.doi.org/10.11646/zootaxa.3692.1.10
KC715778	Macrostylidae	Macrostylis	Macrostylis matildae	SMa63c	ANDEEP-SYSTCO	PS71/039-17 (ANTXXIV-2)	-64.4795	2.87817	2152	Southern Ocean	Lazarev Sea	Maud Rise	Riehl, T., Brandt, A., 2013. Southern Ocean Macrostylidae reviewed with a key to the species and new descriptions from Maud Rise. Zootaxa 3692, 160â€“203. http://dx.doi.org/10.11646/zootaxa.3692.1.10
KC715779	Macrostylidae	Macrostylis	Macrostylis matildae	SMa65c	ANDEEP-SYSTCO	PS71/039-17 (ANTXXIV-2)	-64.4795	2.87817	2152	Southern Ocean	Lazarev Sea	Maud Rise	Riehl, T., Brandt, A., 2013. Southern Ocean Macrostylidae reviewed with a key to the species and new descriptions from Maud Rise. Zootaxa 3692, 160â€“203. http://dx.doi.org/10.11646/zootaxa.3692.1.10
KC715780	Macrostylidae	Macrostylis	Macrostylis matildae	SMa66c	ANDEEP-SYSTCO	PS71/039-17 (ANTXXIV-2)	-64.4795	2.87817	2152	Southern Ocean	Lazarev Sea	Maud Rise	Riehl, T., Brandt, A., 2013. Southern Ocean Macrostylidae reviewed with a key to the species and new descriptions from Maud Rise. Zootaxa 3692, 160â€“203. http://dx.doi.org/10.11646/zootaxa.3692.1.10
MF071222	Macrostylidae	Macrostylis	Macrostylis amaliae	KBMa001	KuramBio	SO223-1-10	43.971	157.328	5417	Pacifc Ocean: Northwest Pacific	Northwest Pacific Abyssal Basin and Kuril Kamchatka Trench Area		Bober, S., Riehl, T., Henne, S., Brandt, A., 2018. New Macrostylidae (Isopoda) from the Northwest Pacific Basin described by means of integrative taxonomy with reference to geographical barriers in the abyss. Zool J Linn Soc 182, 549â€“603. https://doi.org/10.1093/zoolinnean/zlx042
MF071223	Macrostylidae	Macrostylis	Macrostylis amaliae	KBMa002	KuramBio	SO223-1-10	43.971	157.328	5417	Pacifc Ocean: Northwest Pacific	Northwest Pacific Abyssal Basin and Kuril Kamchatka Trench Area		Bober, S., Riehl, T., Henne, S., Brandt, A., 2018. New Macrostylidae (Isopoda) from the Northwest Pacific Basin described by means of integrative taxonomy with reference to geographical barriers in the abyss. Zool J Linn Soc 182, 549â€“603. https://doi.org/10.1093/zoolinnean/zlx042
MF071224	Macrostylidae	Macrostylis	Macrostylis amaliae	KBMa004	KuramBio	SO223-1-10	43.971	157.328	5417	Pacifc Ocean: Northwest Pacific	Northwest Pacific Abyssal Basin and Kuril Kamchatka Trench Area		Bober, S., Riehl, T., Henne, S., Brandt, A., 2018. New Macrostylidae (Isopoda) from the Northwest Pacific Basin described by means of integrative taxonomy with reference to geographical barriers in the abyss. Zool J Linn Soc 182, 549â€“603. https://doi.org/10.1093/zoolinnean/zlx042
MF071225	Macrostylidae	Macrostylis	Macrostylis sabinae	KBMa006	KuramBio	SO223-1-10	43.971	157.328	5417	Pacifc Ocean: Northwest Pacific	Northwest Pacific Abyssal Basin and Kuril Kamchatka Trench Area		Bober, S., Riehl, T., Henne, S., Brandt, A., 2018. New Macrostylidae (Isopoda) from the Northwest Pacific Basin described by means of integrative taxonomy with reference to geographical barriers in the abyss. Zool J Linn Soc 182, 549â€“603. https://doi.org/10.1093/zoolinnean/zlx042
MF071226	Macrostylidae	Macrostylis	Macrostylis amaliae	KBMa018	KuramBio	SO223-1-10	43.971	157.328	5417	Pacifc Ocean: Northwest Pacific	Northwest Pacific Abyssal Basin and Kuril Kamchatka Trench Area		Bober, S., Riehl, T., Henne, S., Brandt, A., 2018. New Macrostylidae (Isopoda) from the Northwest Pacific Basin described by means of integrative taxonomy with reference to geographical barriers in the abyss. Zool J Linn Soc 182, 549â€“603. https://doi.org/10.1093/zoolinnean/zlx042
MF071227	Macrostylidae	Macrostylis	Macrostylis daniae	KBMa029	KuramBio	SO223-2-9	46.2267	155.557	4866	Pacifc Ocean: Northwest Pacific	Northwest Pacific Abyssal Basin and Kuril Kamchatka Trench Area		Bober, S., Riehl, T., Henne, S., Brandt, A., 2018. New Macrostylidae (Isopoda) from the Northwest Pacific Basin described by means of integrative taxonomy with reference to geographical barriers in the abyss. Zool J Linn Soc 182, 549â€“603. https://doi.org/10.1093/zoolinnean/zlx042
MF071228	Macrostylidae	Macrostylis	Macrostylis sabinae	KBMa030	KuramBio	SO223-2-9	46.2267	155.557	4866	Pacifc Ocean: Northwest Pacific	Northwest Pacific Abyssal Basin and Kuril Kamchatka Trench Area		Bober, S., Riehl, T., Henne, S., Brandt, A., 2018. New Macrostylidae (Isopoda) from the Northwest Pacific Basin described by means of integrative taxonomy with reference to geographical barriers in the abyss. Zool J Linn Soc 182, 549â€“603. https://doi.org/10.1093/zoolinnean/zlx042
MF071229	Macrostylidae	Macrostylis	Macrostylis sabinae	KBMa032	KuramBio	SO223-2-9	46.2267	155.557	4866	Pacifc Ocean: Northwest Pacific	Northwest Pacific Abyssal Basin and Kuril Kamchatka Trench Area		Bober, S., Riehl, T., Henne, S., Brandt, A., 2018. New Macrostylidae (Isopoda) from the Northwest Pacific Basin described by means of integrative taxonomy with reference to geographical barriers in the abyss. Zool J Linn Soc 182, 549â€“603. https://doi.org/10.1093/zoolinnean/zlx042
MF071230	Macrostylidae	Macrostylis	Macrostylis amaliae	KBMa034	KuramBio	SO223-2-9	46.2267	155.557	4866	Pacifc Ocean: Northwest Pacific	Northwest Pacific Abyssal Basin and Kuril Kamchatka Trench Area		Bober, S., Riehl, T., Henne, S., Brandt, A., 2018. New Macrostylidae (Isopoda) from the Northwest Pacific Basin described by means of integrative taxonomy with reference to geographical barriers in the abyss. Zool J Linn Soc 182, 549â€“603. https://doi.org/10.1093/zoolinnean/zlx042
MF071231	Macrostylidae	Macrostylis	Macrostylis daniae	KBMa040	KuramBio	SO223-2-9	46.2267	155.557	4866	Pacifc Ocean: Northwest Pacific	Northwest Pacific Abyssal Basin and Kuril Kamchatka Trench Area		Bober, S., Riehl, T., Henne, S., Brandt, A., 2018. New Macrostylidae (Isopoda) from the Northwest Pacific Basin described by means of integrative taxonomy with reference to geographical barriers in the abyss. Zool J Linn Soc 182, 549â€“603. https://doi.org/10.1093/zoolinnean/zlx042
MF071232	Macrostylidae	Macrostylis	Macrostylis daniae	KBMa041	KuramBio	SO223-2-9	46.2267	155.557	4866	Pacifc Ocean: Northwest Pacific	Northwest Pacific Abyssal Basin and Kuril Kamchatka Trench Area		Bober, S., Riehl, T., Henne, S., Brandt, A., 2018. New Macrostylidae (Isopoda) from the Northwest Pacific Basin described by means of integrative taxonomy with reference to geographical barriers in the abyss. Zool J Linn Soc 182, 549â€“603. https://doi.org/10.1093/zoolinnean/zlx042
MF071233	Macrostylidae	Macrostylis	Macrostylis daniae	KBMa042	KuramBio	SO223-2-9	46.2267	155.557	4866	Pacifc Ocean: Northwest Pacific	Northwest Pacific Abyssal Basin and Kuril Kamchatka Trench Area		Bober, S., Riehl, T., Henne, S., Brandt, A., 2018. New Macrostylidae (Isopoda) from the Northwest Pacific Basin described by means of integrative taxonomy with reference to geographical barriers in the abyss. Zool J Linn Soc 182, 549â€“603. https://doi.org/10.1093/zoolinnean/zlx042
MF071234	Macrostylidae	Macrostylis	Macrostylis sabinae	KBMa050	KuramBio	SO223-2-9	46.2267	155.557	4866	Pacifc Ocean: Northwest Pacific	Northwest Pacific Abyssal Basin and Kuril Kamchatka Trench Area		Bober, S., Riehl, T., Henne, S., Brandt, A., 2018. New Macrostylidae (Isopoda) from the Northwest Pacific Basin described by means of integrative taxonomy with reference to geographical barriers in the abyss. Zool J Linn Soc 182, 549â€“603. https://doi.org/10.1093/zoolinnean/zlx042
MF071235	Macrostylidae	Macrostylis	Macrostylis sabinae	KBMa051	KuramBio	SO223-2-9	46.2267	155.557	4866	Pacifc Ocean: Northwest Pacific	Northwest Pacific Abyssal Basin and Kuril Kamchatka Trench Area		Bober, S., Riehl, T., Henne, S., Brandt, A., 2018. New Macrostylidae (Isopoda) from the Northwest Pacific Basin described by means of integrative taxonomy with reference to geographical barriers in the abyss. Zool J Linn Soc 182, 549â€“603. https://doi.org/10.1093/zoolinnean/zlx042
MF071236	Macrostylidae	Macrostylis	Macrostylis amaliae	KBMa052	KuramBio	SO223-2-9	46.2267	155.557	4866	Pacifc Ocean: Northwest Pacific	Northwest Pacific Abyssal Basin and Kuril Kamchatka Trench Area		Bober, S., Riehl, T., Henne, S., Brandt, A., 2018. New Macrostylidae (Isopoda) from the Northwest Pacific Basin described by means of integrative taxonomy with reference to geographical barriers in the abyss. Zool J Linn Soc 182, 549â€“603. https://doi.org/10.1093/zoolinnean/zlx042
MF071237	Macrostylidae	Macrostylis	Macrostylis sabinae	KBMa053	KuramBio	SO223-2-9	46.2267	155.557	4866	Pacifc Ocean: Northwest Pacific	Northwest Pacific Abyssal Basin and Kuril Kamchatka Trench Area		Bober, S., Riehl, T., Henne, S., Brandt, A., 2018. New Macrostylidae (Isopoda) from the Northwest Pacific Basin described by means of integrative taxonomy with reference to geographical barriers in the abyss. Zool J Linn Soc 182, 549â€“603. https://doi.org/10.1093/zoolinnean/zlx042
MF071238	Macrostylidae	Macrostylis	Macrostylis sabinae	KBMa054	KuramBio	SO223-2-9	46.2267	155.557	4866	Pacifc Ocean: Northwest Pacific	Northwest Pacific Abyssal Basin and Kuril Kamchatka Trench Area		Bober, S., Riehl, T., Henne, S., Brandt, A., 2018. New Macrostylidae (Isopoda) from the Northwest Pacific Basin described by means of integrative taxonomy with reference to geographical barriers in the abyss. Zool J Linn Soc 182, 549â€“603. https://doi.org/10.1093/zoolinnean/zlx042
MF071239	Macrostylidae	Macrostylis	Macrostylis sabinae	KBMa057	KuramBio	SO223-2-9	46.2267	155.557	4866	Pacifc Ocean: Northwest Pacific	Northwest Pacific Abyssal Basin and Kuril Kamchatka Trench Area		Bober, S., Riehl, T., Henne, S., Brandt, A., 2018. New Macrostylidae (Isopoda) from the Northwest Pacific Basin described by means of integrative taxonomy with reference to geographical barriers in the abyss. Zool J Linn Soc 182, 549â€“603. https://doi.org/10.1093/zoolinnean/zlx042
MF071240	Macrostylidae	Macrostylis	Macrostylis amaliae	KBMa058	KuramBio	SO223-2-9	46.2267	155.557	4866	Pacifc Ocean: Northwest Pacific	Northwest Pacific Abyssal Basin and Kuril Kamchatka Trench Area		Bober, S., Riehl, T., Henne, S., Brandt, A., 2018. New Macrostylidae (Isopoda) from the Northwest Pacific Basin described by means of integrative taxonomy with reference to geographical barriers in the abyss. Zool J Linn Soc 182, 549â€“603. https://doi.org/10.1093/zoolinnean/zlx042
MF071241	Macrostylidae	Macrostylis	Macrostylis sabinae	KBMa059	KuramBio	SO223-2-9	46.2267	155.557	4866	Pacifc Ocean: Northwest Pacific	Northwest Pacific Abyssal Basin and Kuril Kamchatka Trench Area		Bober, S., Riehl, T., Henne, S., Brandt, A., 2018. New Macrostylidae (Isopoda) from the Northwest Pacific Basin described by means of integrative taxonomy with reference to geographical barriers in the abyss. Zool J Linn Soc 182, 549â€“603. https://doi.org/10.1093/zoolinnean/zlx042
MF071242	Macrostylidae	Macrostylis	Macrostylis amaliae	KBMa060	KuramBio	SO223-2-9	46.2267	155.557	4866	Pacifc Ocean: Northwest Pacific	Northwest Pacific Abyssal Basin and Kuril Kamchatka Trench Area		Bober, S., Riehl, T., Henne, S., Brandt, A., 2018. New Macrostylidae (Isopoda) from the Northwest Pacific Basin described by means of integrative taxonomy with reference to geographical barriers in the abyss. Zool J Linn Soc 182, 549â€“603. https://doi.org/10.1093/zoolinnean/zlx042
MF071243	Macrostylidae	Macrostylis	Macrostylis sabinae	KBMa062	KuramBio	SO223-2-9	46.2267	155.557	4866	Pacifc Ocean: Northwest Pacific	Northwest Pacific Abyssal Basin and Kuril Kamchatka Trench Area		Bober, S., Riehl, T., Henne, S., Brandt, A., 2018. New Macrostylidae (Isopoda) from the Northwest Pacific Basin described by means of integrative taxonomy with reference to geographical barriers in the abyss. Zool J Linn Soc 182, 549â€“603. https://doi.org/10.1093/zoolinnean/zlx042
MF071244	Macrostylidae	Macrostylis	Macrostylis amaliae	KBMa063	KuramBio	SO223-2-9	46.2267	155.557	4866	Pacifc Ocean: Northwest Pacific	Northwest Pacific Abyssal Basin and Kuril Kamchatka Trench Area		Bober, S., Riehl, T., Henne, S., Brandt, A., 2018. New Macrostylidae (Isopoda) from the Northwest Pacific Basin described by means of integrative taxonomy with reference to geographical barriers in the abyss. Zool J Linn Soc 182, 549â€“603. https://doi.org/10.1093/zoolinnean/zlx042
MF071245	Macrostylidae	Macrostylis	Macrostylis sabinae	KBMa067	KuramBio	SO223-2-9	46.2267	155.557	4866	Pacifc Ocean: Northwest Pacific	Northwest Pacific Abyssal Basin and Kuril Kamchatka Trench Area		Bober, S., Riehl, T., Henne, S., Brandt, A., 2018. New Macrostylidae (Isopoda) from the Northwest Pacific Basin described by means of integrative taxonomy with reference to geographical barriers in the abyss. Zool J Linn Soc 182, 549â€“603. https://doi.org/10.1093/zoolinnean/zlx042
MF071246	Macrostylidae	Macrostylis	Macrostylis daniae	KBMa070	KuramBio	SO223-2-9	46.2267	155.557	4866	Pacifc Ocean: Northwest Pacific	Northwest Pacific Abyssal Basin and Kuril Kamchatka Trench Area		Bober, S., Riehl, T., Henne, S., Brandt, A., 2018. New Macrostylidae (Isopoda) from the Northwest Pacific Basin described by means of integrative taxonomy with reference to geographical barriers in the abyss. Zool J Linn Soc 182, 549â€“603. https://doi.org/10.1093/zoolinnean/zlx042
MF071247	Macrostylidae	Macrostylis	Macrostylis daniae	KBMa071	KuramBio	SO223-2-9	46.2267	155.557	4866	Pacifc Ocean: Northwest Pacific	Northwest Pacific Abyssal Basin and Kuril Kamchatka Trench Area		Bober, S., Riehl, T., Henne, S., Brandt, A., 2018. New Macrostylidae (Isopoda) from the Northwest Pacific Basin described by means of integrative taxonomy with reference to geographical barriers in the abyss. Zool J Linn Soc 182, 549â€“603. https://doi.org/10.1093/zoolinnean/zlx042
MF071248	Macrostylidae	Macrostylis	Macrostylis daniae	KBMa072	KuramBio	SO223-2-9	46.2267	155.557	4866	Pacifc Ocean: Northwest Pacific	Northwest Pacific Abyssal Basin and Kuril Kamchatka Trench Area		Bober, S., Riehl, T., Henne, S., Brandt, A., 2018. New Macrostylidae (Isopoda) from the Northwest Pacific Basin described by means of integrative taxonomy with reference to geographical barriers in the abyss. Zool J Linn Soc 182, 549â€“603. https://doi.org/10.1093/zoolinnean/zlx042
MF071250	Macrostylidae	Macrostylis	Macrostylis daniae	KBMa077	KuramBio	SO223-2-9	46.2267	155.557	4866	Pacifc Ocean: Northwest Pacific	Northwest Pacific Abyssal Basin and Kuril Kamchatka Trench Area		Bober, S., Riehl, T., Henne, S., Brandt, A., 2018. New Macrostylidae (Isopoda) from the Northwest Pacific Basin described by means of integrative taxonomy with reference to geographical barriers in the abyss. Zool J Linn Soc 182, 549â€“603. https://doi.org/10.1093/zoolinnean/zlx042
MF071251	Macrostylidae	Macrostylis	Macrostylis daniae	KBMa078	KuramBio	SO223-2-9	46.2267	155.557	4866	Pacifc Ocean: Northwest Pacific	Northwest Pacific Abyssal Basin and Kuril Kamchatka Trench Area		Bober, S., Riehl, T., Henne, S., Brandt, A., 2018. New Macrostylidae (Isopoda) from the Northwest Pacific Basin described by means of integrative taxonomy with reference to geographical barriers in the abyss. Zool J Linn Soc 182, 549â€“603. https://doi.org/10.1093/zoolinnean/zlx042
MF071252	Macrostylidae	Macrostylis	Macrostylis daniae	KBMa079	KuramBio	SO223-2-9	46.2267	155.557	4866	Pacifc Ocean: Northwest Pacific	Northwest Pacific Abyssal Basin and Kuril Kamchatka Trench Area		Bober, S., Riehl, T., Henne, S., Brandt, A., 2018. New Macrostylidae (Isopoda) from the Northwest Pacific Basin described by means of integrative taxonomy with reference to geographical barriers in the abyss. Zool J Linn Soc 182, 549â€“603. https://doi.org/10.1093/zoolinnean/zlx042
MF071253	Macrostylidae	Macrostylis	Macrostylis daniae	KBMa080	KuramBio	SO223-2-9	46.2267	155.557	4866	Pacifc Ocean: Northwest Pacific	Northwest Pacific Abyssal Basin and Kuril Kamchatka Trench Area		Bober, S., Riehl, T., Henne, S., Brandt, A., 2018. New Macrostylidae (Isopoda) from the Northwest Pacific Basin described by means of integrative taxonomy with reference to geographical barriers in the abyss. Zool J Linn Soc 182, 549â€“603. https://doi.org/10.1093/zoolinnean/zlx042
MF071255	Macrostylidae	Macrostylis	Macrostylis daniae	KBMa082	KuramBio	SO223-2-9	46.2267	155.557	4866	Pacifc Ocean: Northwest Pacific	Northwest Pacific Abyssal Basin and Kuril Kamchatka Trench Area		Bober, S., Riehl, T., Henne, S., Brandt, A., 2018. New Macrostylidae (Isopoda) from the Northwest Pacific Basin described by means of integrative taxonomy with reference to geographical barriers in the abyss. Zool J Linn Soc 182, 549â€“603. https://doi.org/10.1093/zoolinnean/zlx042
MF071256	Macrostylidae	Macrostylis	Macrostylis daniae	KBMa083	KuramBio	SO223-2-9	46.2267	155.557	4866	Pacifc Ocean: Northwest Pacific	Northwest Pacific Abyssal Basin and Kuril Kamchatka Trench Area		Bober, S., Riehl, T., Henne, S., Brandt, A., 2018. New Macrostylidae (Isopoda) from the Northwest Pacific Basin described by means of integrative taxonomy with reference to geographical barriers in the abyss. Zool J Linn Soc 182, 549â€“603. https://doi.org/10.1093/zoolinnean/zlx042
MF071257	Macrostylidae	Macrostylis	Macrostylis daniae	KBMa084	KuramBio	SO223-2-9	46.2267	155.557	4866	Pacifc Ocean: Northwest Pacific	Northwest Pacific Abyssal Basin and Kuril Kamchatka Trench Area		Bober, S., Riehl, T., Henne, S., Brandt, A., 2018. New Macrostylidae (Isopoda) from the Northwest Pacific Basin described by means of integrative taxonomy with reference to geographical barriers in the abyss. Zool J Linn Soc 182, 549â€“603. https://doi.org/10.1093/zoolinnean/zlx042
MF071267	Macrostylidae	Macrostylis	Macrostylis sabinae	KBMa117	KuramBio	SO223-3-9	47.2305	154.698	4988	Pacifc Ocean: Northwest Pacific	Northwest Pacific Abyssal Basin and Kuril Kamchatka Trench Area		Bober, S., Riehl, T., Henne, S., Brandt, A., 2018. New Macrostylidae (Isopoda) from the Northwest Pacific Basin described by means of integrative taxonomy with reference to geographical barriers in the abyss. Zool J Linn Soc 182, 549â€“603. https://doi.org/10.1093/zoolinnean/zlx042
MF071268	Macrostylidae	Macrostylis	Macrostylis sabinae	KBMa118	KuramBio	SO223-3-9	47.2305	154.698	4988	Pacifc Ocean: Northwest Pacific	Northwest Pacific Abyssal Basin and Kuril Kamchatka Trench Area		Bober, S., Riehl, T., Henne, S., Brandt, A., 2018. New Macrostylidae (Isopoda) from the Northwest Pacific Basin described by means of integrative taxonomy with reference to geographical barriers in the abyss. Zool J Linn Soc 182, 549â€“603. https://doi.org/10.1093/zoolinnean/zlx042
MF071269	Macrostylidae	Macrostylis	Macrostylis sabinae	KBMa119	KuramBio	SO223-3-9	47.2305	154.698	4988	Pacifc Ocean: Northwest Pacific	Northwest Pacific Abyssal Basin and Kuril Kamchatka Trench Area		Bober, S., Riehl, T., Henne, S., Brandt, A., 2018. New Macrostylidae (Isopoda) from the Northwest Pacific Basin described by means of integrative taxonomy with reference to geographical barriers in the abyss. Zool J Linn Soc 182, 549â€“603. https://doi.org/10.1093/zoolinnean/zlx042
MF071258	Macrostylidae	Macrostylis	Macrostylis amaliae	KBMa105	KuramBio	SO223-5-9	43.5917	153.965	5378	Pacifc Ocean: Northwest Pacific	Northwest Pacific Abyssal Basin and Kuril Kamchatka Trench Area		Bober, S., Riehl, T., Henne, S., Brandt, A., 2018. New Macrostylidae (Isopoda) from the Northwest Pacific Basin described by means of integrative taxonomy with reference to geographical barriers in the abyss. Zool J Linn Soc 182, 549â€“603. https://doi.org/10.1093/zoolinnean/zlx042
MF071259	Macrostylidae	Macrostylis	Macrostylis sabinae	KBMa106	KuramBio	SO223-5-9	43.5917	153.965	5378	Pacifc Ocean: Northwest Pacific	Northwest Pacific Abyssal Basin and Kuril Kamchatka Trench Area		Bober, S., Riehl, T., Henne, S., Brandt, A., 2018. New Macrostylidae (Isopoda) from the Northwest Pacific Basin described by means of integrative taxonomy with reference to geographical barriers in the abyss. Zool J Linn Soc 182, 549â€“603. https://doi.org/10.1093/zoolinnean/zlx042
MF071260	Macrostylidae	Macrostylis	Macrostylis sabinae	KBMa108	KuramBio	SO223-5-9	43.5917	153.965	5378	Pacifc Ocean: Northwest Pacific	Northwest Pacific Abyssal Basin and Kuril Kamchatka Trench Area		Bober, S., Riehl, T., Henne, S., Brandt, A., 2018. New Macrostylidae (Isopoda) from the Northwest Pacific Basin described by means of integrative taxonomy with reference to geographical barriers in the abyss. Zool J Linn Soc 182, 549â€“603. https://doi.org/10.1093/zoolinnean/zlx042
MF071261	Macrostylidae	Macrostylis	Macrostylis amaliae	KBMa109	KuramBio	SO223-5-9	43.5917	153.965	5378	Pacifc Ocean: Northwest Pacific	Northwest Pacific Abyssal Basin and Kuril Kamchatka Trench Area		Bober, S., Riehl, T., Henne, S., Brandt, A., 2018. New Macrostylidae (Isopoda) from the Northwest Pacific Basin described by means of integrative taxonomy with reference to geographical barriers in the abyss. Zool J Linn Soc 182, 549â€“603. https://doi.org/10.1093/zoolinnean/zlx042
MF071262	Macrostylidae	Macrostylis	Macrostylis daniae	KBMa110	KuramBio	SO223-5-9	43.5917	153.965	5378	Pacifc Ocean: Northwest Pacific	Northwest Pacific Abyssal Basin and Kuril Kamchatka Trench Area		Bober, S., Riehl, T., Henne, S., Brandt, A., 2018. New Macrostylidae (Isopoda) from the Northwest Pacific Basin described by means of integrative taxonomy with reference to geographical barriers in the abyss. Zool J Linn Soc 182, 549â€“603. https://doi.org/10.1093/zoolinnean/zlx042
MF071263	Macrostylidae	Macrostylis	Macrostylis daniae	KBMa111	KuramBio	SO223-5-9	43.5917	153.965	5378	Pacifc Ocean: Northwest Pacific	Northwest Pacific Abyssal Basin and Kuril Kamchatka Trench Area		Bober, S., Riehl, T., Henne, S., Brandt, A., 2018. New Macrostylidae (Isopoda) from the Northwest Pacific Basin described by means of integrative taxonomy with reference to geographical barriers in the abyss. Zool J Linn Soc 182, 549â€“603. https://doi.org/10.1093/zoolinnean/zlx042
MF071264	Macrostylidae	Macrostylis	Macrostylis daniae	KBMa112	KuramBio	SO223-5-9	43.5917	153.965	5378	Pacifc Ocean: Northwest Pacific	Northwest Pacific Abyssal Basin and Kuril Kamchatka Trench Area		Bober, S., Riehl, T., Henne, S., Brandt, A., 2018. New Macrostylidae (Isopoda) from the Northwest Pacific Basin described by means of integrative taxonomy with reference to geographical barriers in the abyss. Zool J Linn Soc 182, 549â€“603. https://doi.org/10.1093/zoolinnean/zlx042
MF071265	Macrostylidae	Macrostylis	Macrostylis daniae	KBMa113	KuramBio	SO223-5-9	43.5917	153.965	5378	Pacifc Ocean: Northwest Pacific	Northwest Pacific Abyssal Basin and Kuril Kamchatka Trench Area		Bober, S., Riehl, T., Henne, S., Brandt, A., 2018. New Macrostylidae (Isopoda) from the Northwest Pacific Basin described by means of integrative taxonomy with reference to geographical barriers in the abyss. Zool J Linn Soc 182, 549â€“603. https://doi.org/10.1093/zoolinnean/zlx042
MF071266	Macrostylidae	Macrostylis	Macrostylis daniae	KBMa116	KuramBio	SO223-5-9	43.5917	153.965	5378	Pacifc Ocean: Northwest Pacific	Northwest Pacific Abyssal Basin and Kuril Kamchatka Trench Area		Bober, S., Riehl, T., Henne, S., Brandt, A., 2018. New Macrostylidae (Isopoda) from the Northwest Pacific Basin described by means of integrative taxonomy with reference to geographical barriers in the abyss. Zool J Linn Soc 182, 549â€“603. https://doi.org/10.1093/zoolinnean/zlx042
MF071249	Macrostylidae	Macrostylis	Macrostylis amaliae	KBMa073	KuramBio	SO223-6-7	42.4822	153.999	5295	Pacifc Ocean: Northwest Pacific	Northwest Pacific Abyssal Basin and Kuril Kamchatka Trench Area		Bober, S., Riehl, T., Henne, S., Brandt, A., 2018. New Macrostylidae (Isopoda) from the Northwest Pacific Basin described by means of integrative taxonomy with reference to geographical barriers in the abyss. Zool J Linn Soc 182, 549â€“603. https://doi.org/10.1093/zoolinnean/zlx042
MF071270	Macrostylidae	Macrostylis	Macrostylis daniae	KBMa120	KuramBio	SO223-6-11	42.493	154.001	5290	Pacifc Ocean: Northwest Pacific	Northwest Pacific Abyssal Basin and Kuril Kamchatka Trench Area		Bober, S., Riehl, T., Henne, S., Brandt, A., 2018. New Macrostylidae (Isopoda) from the Northwest Pacific Basin described by means of integrative taxonomy with reference to geographical barriers in the abyss. Zool J Linn Soc 182, 549â€“603. https://doi.org/10.1093/zoolinnean/zlx042
MF071271	Macrostylidae	Macrostylis	Macrostylis sabinae	KBMa132	KuramBio	SO223-7-9	43.0478	152.991	5216	Pacifc Ocean: Northwest Pacific	Northwest Pacific Abyssal Basin and Kuril Kamchatka Trench Area		Bober, S., Riehl, T., Henne, S., Brandt, A., 2018. New Macrostylidae (Isopoda) from the Northwest Pacific Basin described by means of integrative taxonomy with reference to geographical barriers in the abyss. Zool J Linn Soc 182, 549â€“603. https://doi.org/10.1093/zoolinnean/zlx042
MF071254	Macrostylidae	Macrostylis	Macrostylis amaliae	KBMa081	KuramBio	SO223-10-6	41.1993	150.095	5250	Pacifc Ocean: Northwest Pacific	Northwest Pacific Abyssal Basin and Kuril Kamchatka Trench Area		Bober, S., Riehl, T., Henne, S., Brandt, A., 2018. New Macrostylidae (Isopoda) from the Northwest Pacific Basin described by means of integrative taxonomy with reference to geographical barriers in the abyss. Zool J Linn Soc 182, 549â€“603. https://doi.org/10.1093/zoolinnean/zlx042
LT909201	Macrostylidae	Macrostylis	Macrostylis sp. ML08	VTMac047	Vema-TRANSIT	SO237-2-6	10.7297	-25.062	5520	Atlantic Ocean: North Atlantic	Eastern Vema Fracture Zone	Vema-TRANSIT site A1	Riehl, T., Lins, L. & Brandt, A. The effects of depth, distance, and the Mid-Atlantic Ridge on genetic differentiation of abyssal and hadal isopods (Macrostylidae). Deep Sea Research Part II: Topical Studies in Oceanography.
LT909202	Macrostylidae	Macrostylis	Macrostylis sp. ML02	VTMac048	Vema-TRANSIT	SO237-2-6	10.7297	-25.062	5520	Atlantic Ocean: North Atlantic	Eastern Vema Fracture Zone	Vema-TRANSIT site A1	Riehl, T., Lins, L. & Brandt, A. The effects of depth, distance, and the Mid-Atlantic Ridge on genetic differentiation of abyssal and hadal isopods (Macrostylidae). Deep Sea Research Part II: Topical Studies in Oceanography.
LT909174	Macrostylidae	Macrostylis	Macrostylis sp. ML08	VTMac017	Vema-TRANSIT	SO237-2-7	10.7149	-25.0535	5514	Atlantic Ocean: North Atlantic	Eastern Vema Fracture Zone	Vema-TRANSIT site A1	Riehl, T., Lins, L. & Brandt, A. The effects of depth, distance, and the Mid-Atlantic Ridge on genetic differentiation of abyssal and hadal isopods (Macrostylidae). Deep Sea Research Part II: Topical Studies in Oceanography.
LT909175	Macrostylidae	Macrostylis	Macrostylis sp. ML02	VTMac018	Vema-TRANSIT	SO237-2-7	10.7149	-25.0535	5514	Atlantic Ocean: North Atlantic	Eastern Vema Fracture Zone	Vema-TRANSIT site A1	Riehl, T., Lins, L. & Brandt, A. The effects of depth, distance, and the Mid-Atlantic Ridge on genetic differentiation of abyssal and hadal isopods (Macrostylidae). Deep Sea Research Part II: Topical Studies in Oceanography.
LT909176	Macrostylidae	Macrostylis	Macrostylis sp. ML02	VTMac019	Vema-TRANSIT	SO237-2-7	10.7149	-25.0535	5514	Atlantic Ocean: North Atlantic	Eastern Vema Fracture Zone	Vema-TRANSIT site A1	Riehl, T., Lins, L. & Brandt, A. The effects of depth, distance, and the Mid-Atlantic Ridge on genetic differentiation of abyssal and hadal isopods (Macrostylidae). Deep Sea Research Part II: Topical Studies in Oceanography.
LT909177	Macrostylidae	Macrostylis	Macrostylis sp. ML08	VTMac020	Vema-TRANSIT	SO237-2-7	10.7149	-25.0535	5514	Atlantic Ocean: North Atlantic	Eastern Vema Fracture Zone	Vema-TRANSIT site A1	Riehl, T., Lins, L. & Brandt, A. The effects of depth, distance, and the Mid-Atlantic Ridge on genetic differentiation of abyssal and hadal isopods (Macrostylidae). Deep Sea Research Part II: Topical Studies in Oceanography.
LT909178	Macrostylidae	Macrostylis	Macrostylis sp. ML02	VTMac022	Vema-TRANSIT	SO237-2-7	10.7149	-25.0535	5514	Atlantic Ocean: North Atlantic	Eastern Vema Fracture Zone	Vema-TRANSIT site A1	Riehl, T., Lins, L. & Brandt, A. The effects of depth, distance, and the Mid-Atlantic Ridge on genetic differentiation of abyssal and hadal isopods (Macrostylidae). Deep Sea Research Part II: Topical Studies in Oceanography.
LT909179	Macrostylidae	Macrostylis	Macrostylis sp. ML08	VTMac023	Vema-TRANSIT	SO237-2-7	10.7149	-25.0535	5514	Atlantic Ocean: North Atlantic	Eastern Vema Fracture Zone	Vema-TRANSIT site A1	Riehl, T., Lins, L. & Brandt, A. The effects of depth, distance, and the Mid-Atlantic Ridge on genetic differentiation of abyssal and hadal isopods (Macrostylidae). Deep Sea Research Part II: Topical Studies in Oceanography.
LT909180	Macrostylidae	Macrostylis	Macrostylis sp. ML08	VTMac024	Vema-TRANSIT	SO237-2-7	10.7149	-25.0535	5514	Atlantic Ocean: North Atlantic	Eastern Vema Fracture Zone	Vema-TRANSIT site A1	Riehl, T., Lins, L. & Brandt, A. The effects of depth, distance, and the Mid-Atlantic Ridge on genetic differentiation of abyssal and hadal isopods (Macrostylidae). Deep Sea Research Part II: Topical Studies in Oceanography.
LT909181	Macrostylidae	Macrostylis	Macrostylis sp. ML08	VTMac025	Vema-TRANSIT	SO237-2-7	10.7149	-25.0535	5514	Atlantic Ocean: North Atlantic	Eastern Vema Fracture Zone	Vema-TRANSIT site A1	Riehl, T., Lins, L. & Brandt, A. The effects of depth, distance, and the Mid-Atlantic Ridge on genetic differentiation of abyssal and hadal isopods (Macrostylidae). Deep Sea Research Part II: Topical Studies in Oceanography.
LT909182	Macrostylidae	Macrostylis	Macrostylis sp. ML08	VTMac026	Vema-TRANSIT	SO237-2-7	10.7149	-25.0535	5514	Atlantic Ocean: North Atlantic	Eastern Vema Fracture Zone	Vema-TRANSIT site A1	Riehl, T., Lins, L. & Brandt, A. The effects of depth, distance, and the Mid-Atlantic Ridge on genetic differentiation of abyssal and hadal isopods (Macrostylidae). Deep Sea Research Part II: Topical Studies in Oceanography.
LT909183	Macrostylidae	Macrostylis	Macrostylis sp. ML08	VTMac027	Vema-TRANSIT	SO237-2-7	10.7149	-25.0535	5514	Atlantic Ocean: North Atlantic	Eastern Vema Fracture Zone	Vema-TRANSIT site A1	Riehl, T., Lins, L. & Brandt, A. The effects of depth, distance, and the Mid-Atlantic Ridge on genetic differentiation of abyssal and hadal isopods (Macrostylidae). Deep Sea Research Part II: Topical Studies in Oceanography.
LT909184	Macrostylidae	Macrostylis	Macrostylis sp. ML08	VTMac028	Vema-TRANSIT	SO237-2-7	10.7149	-25.0535	5514	Atlantic Ocean: North Atlantic	Eastern Vema Fracture Zone	Vema-TRANSIT site A1	Riehl, T., Lins, L. & Brandt, A. The effects of depth, distance, and the Mid-Atlantic Ridge on genetic differentiation of abyssal and hadal isopods (Macrostylidae). Deep Sea Research Part II: Topical Studies in Oceanography.
LT909185	Macrostylidae	Macrostylis	Macrostylis sp. ML03	VTMac029	Vema-TRANSIT	SO237-2-7	10.7149	-25.0535	5514	Atlantic Ocean: North Atlantic	Eastern Vema Fracture Zone	Vema-TRANSIT site A1	Riehl, T., Lins, L. & Brandt, A. The effects of depth, distance, and the Mid-Atlantic Ridge on genetic differentiation of abyssal and hadal isopods (Macrostylidae). Deep Sea Research Part II: Topical Studies in Oceanography.
LT909186	Macrostylidae	Macrostylis	Macrostylis sp. ML08	VTMac030	Vema-TRANSIT	SO237-2-7	10.7149	-25.0535	5514	Atlantic Ocean: North Atlantic	Eastern Vema Fracture Zone	Vema-TRANSIT site A1	Riehl, T., Lins, L. & Brandt, A. The effects of depth, distance, and the Mid-Atlantic Ridge on genetic differentiation of abyssal and hadal isopods (Macrostylidae). Deep Sea Research Part II: Topical Studies in Oceanography.
LT909187	Macrostylidae	Macrostylis	Macrostylis sp. ML08	VTMac031	Vema-TRANSIT	SO237-2-7	10.7149	-25.0535	5514	Atlantic Ocean: North Atlantic	Eastern Vema Fracture Zone	Vema-TRANSIT site A1	Riehl, T., Lins, L. & Brandt, A. The effects of depth, distance, and the Mid-Atlantic Ridge on genetic differentiation of abyssal and hadal isopods (Macrostylidae). Deep Sea Research Part II: Topical Studies in Oceanography.
LT909188	Macrostylidae	Macrostylis	Macrostylis sp. ML08	VTMac032	Vema-TRANSIT	SO237-2-7	10.7149	-25.0535	5514	Atlantic Ocean: North Atlantic	Eastern Vema Fracture Zone	Vema-TRANSIT site A1	Riehl, T., Lins, L. & Brandt, A. The effects of depth, distance, and the Mid-Atlantic Ridge on genetic differentiation of abyssal and hadal isopods (Macrostylidae). Deep Sea Research Part II: Topical Studies in Oceanography.
LT909189	Macrostylidae	Macrostylis	Macrostylis sp. ML08	VTMac033	Vema-TRANSIT	SO237-2-7	10.7149	-25.0535	5514	Atlantic Ocean: North Atlantic	Eastern Vema Fracture Zone	Vema-TRANSIT site A1	Riehl, T., Lins, L. & Brandt, A. The effects of depth, distance, and the Mid-Atlantic Ridge on genetic differentiation of abyssal and hadal isopods (Macrostylidae). Deep Sea Research Part II: Topical Studies in Oceanography.
LT909191	Macrostylidae	Macrostylis	Macrostylis sp. ML02	VTMac035	Vema-TRANSIT	SO237-2-7	10.7149	-25.0535	5514	Atlantic Ocean: North Atlantic	Eastern Vema Fracture Zone	Vema-TRANSIT site A1	Riehl, T., Lins, L. & Brandt, A. The effects of depth, distance, and the Mid-Atlantic Ridge on genetic differentiation of abyssal and hadal isopods (Macrostylidae). Deep Sea Research Part II: Topical Studies in Oceanography.
LT909192	Macrostylidae	Macrostylis	Macrostylis sp. ML08	VTMac036	Vema-TRANSIT	SO237-2-7	10.7149	-25.0535	5514	Atlantic Ocean: North Atlantic	Eastern Vema Fracture Zone	Vema-TRANSIT site A1	Riehl, T., Lins, L. & Brandt, A. The effects of depth, distance, and the Mid-Atlantic Ridge on genetic differentiation of abyssal and hadal isopods (Macrostylidae). Deep Sea Research Part II: Topical Studies in Oceanography.
LT909193	Macrostylidae	Macrostylis	Macrostylis sp. ML08	VTMac038	Vema-TRANSIT	SO237-2-7	10.7149	-25.0535	5514	Atlantic Ocean: North Atlantic	Eastern Vema Fracture Zone	Vema-TRANSIT site A1	Riehl, T., Lins, L. & Brandt, A. The effects of depth, distance, and the Mid-Atlantic Ridge on genetic differentiation of abyssal and hadal isopods (Macrostylidae). Deep Sea Research Part II: Topical Studies in Oceanography.
LT909194	Macrostylidae	Macrostylis	Macrostylis sp. ML08	VTMac039	Vema-TRANSIT	SO237-2-7	10.7149	-25.0535	5514	Atlantic Ocean: North Atlantic	Eastern Vema Fracture Zone	Vema-TRANSIT site A1	Riehl, T., Lins, L. & Brandt, A. The effects of depth, distance, and the Mid-Atlantic Ridge on genetic differentiation of abyssal and hadal isopods (Macrostylidae). Deep Sea Research Part II: Topical Studies in Oceanography.
LT909195	Macrostylidae	Macrostylis	Macrostylis sp. ML03	VTMac040	Vema-TRANSIT	SO237-2-7	10.7149	-25.0535	5514	Atlantic Ocean: North Atlantic	Eastern Vema Fracture Zone	Vema-TRANSIT site A1	Riehl, T., Lins, L. & Brandt, A. The effects of depth, distance, and the Mid-Atlantic Ridge on genetic differentiation of abyssal and hadal isopods (Macrostylidae). Deep Sea Research Part II: Topical Studies in Oceanography.
LT909196	Macrostylidae	Macrostylis	Macrostylis sp. ML08	VTMac041	Vema-TRANSIT	SO237-2-7	10.7149	-25.0535	5514	Atlantic Ocean: North Atlantic	Eastern Vema Fracture Zone	Vema-TRANSIT site A1	Riehl, T., Lins, L. & Brandt, A. The effects of depth, distance, and the Mid-Atlantic Ridge on genetic differentiation of abyssal and hadal isopods (Macrostylidae). Deep Sea Research Part II: Topical Studies in Oceanography.
LT909197	Macrostylidae	Macrostylis	Macrostylis sp. ML08	VTMac042	Vema-TRANSIT	SO237-2-7	10.7149	-25.0535	5514	Atlantic Ocean: North Atlantic	Eastern Vema Fracture Zone	Vema-TRANSIT site A1	Riehl, T., Lins, L. & Brandt, A. The effects of depth, distance, and the Mid-Atlantic Ridge on genetic differentiation of abyssal and hadal isopods (Macrostylidae). Deep Sea Research Part II: Topical Studies in Oceanography.
LT909198	Macrostylidae	Macrostylis	Macrostylis sp. ML02	VTMac043	Vema-TRANSIT	SO237-2-7	10.7149	-25.0535	5514	Atlantic Ocean: North Atlantic	Eastern Vema Fracture Zone	Vema-TRANSIT site A1	Riehl, T., Lins, L. & Brandt, A. The effects of depth, distance, and the Mid-Atlantic Ridge on genetic differentiation of abyssal and hadal isopods (Macrostylidae). Deep Sea Research Part II: Topical Studies in Oceanography.
LT909199	Macrostylidae	Macrostylis	Macrostylis sp. ML08	VTMac044	Vema-TRANSIT	SO237-2-7	10.7149	-25.0535	5514	Atlantic Ocean: North Atlantic	Eastern Vema Fracture Zone	Vema-TRANSIT site A1	Riehl, T., Lins, L. & Brandt, A. The effects of depth, distance, and the Mid-Atlantic Ridge on genetic differentiation of abyssal and hadal isopods (Macrostylidae). Deep Sea Research Part II: Topical Studies in Oceanography.
LT909200	Macrostylidae	Macrostylis	Macrostylis sp. ML08	VTMac045	Vema-TRANSIT	SO237-2-7	10.7149	-25.0535	5514	Atlantic Ocean: North Atlantic	Eastern Vema Fracture Zone	Vema-TRANSIT site A1	Riehl, T., Lins, L. & Brandt, A. The effects of depth, distance, and the Mid-Atlantic Ridge on genetic differentiation of abyssal and hadal isopods (Macrostylidae). Deep Sea Research Part II: Topical Studies in Oceanography.
MF325635	Desmosomatodae	Chelator	Chelator aequabilis	VTDes034	Vema-TRANSIT	SO237-2-7	10.7149	-25.0535	5514	Atlantic Ocean: North Atlantic	Eastern Vema Fracture Zone	Vema-TRANSIT site A1	Brix, S., Bober, S., Tschesche, C., Kihara, T.C., Driskell, A.C., Jennings, R.M., 2018. Molecular species delimitation and its implications for species descriptions using desmosomatid and nannoniscid isopods from the VEMA fracture zone as example taxa. Deep-Sea Res. Pt. II 148, 180â€“207. https://doi.org/10.1016/j.dsr2.2018.02.004
MF325671	Desmosomatidae	Parvochelus	Parvochelus russus	VTDes031	Vema-TRANSIT	SO237-2-7	10.7149	-25.0535	5514	Atlantic Ocean: North Atlantic	Eastern Vema Fracture Zone	Vema-TRANSIT site A1	Brix, S., Bober, S., Tschesche, C., Kihara, T.C., Driskell, A.C., Jennings, R.M., 2018. Molecular species delimitation and its implications for species descriptions using desmosomatid and nannoniscid isopods from the VEMA fracture zone as example taxa. Deep-Sea Res. Pt. II 148, 180â€“207. https://doi.org/10.1016/j.dsr2.2018.02.004
LT909190	Macrostylidae	Macrostylis	Macrostylis sp. ML08	VTMac034	Vema-TRANSIT	SO237-4-8	10.427	-31.0733	5735	Atlantic Ocean: North Atlantic	Eastern Vema Fracture Zone	Vema-TRANSIT site A2	Riehl, T., Lins, L. & Brandt, A. The effects of depth, distance, and the Mid-Atlantic Ridge on genetic differentiation of abyssal and hadal isopods (Macrostylidae). Deep Sea Research Part II: Topical Studies in Oceanography.
LT909204	Macrostylidae	Macrostylis	Macrostylis sp. ML08	VTMac050	Vema-TRANSIT	SO237-4-8	10.427	-31.0733	5735	Atlantic Ocean: North Atlantic	Eastern Vema Fracture Zone	Vema-TRANSIT site A2	Riehl, T., Lins, L. & Brandt, A. The effects of depth, distance, and the Mid-Atlantic Ridge on genetic differentiation of abyssal and hadal isopods (Macrostylidae). Deep Sea Research Part II: Topical Studies in Oceanography.
LT909205	Macrostylidae	Macrostylis	Macrostylis sp. ML08	VTMac051	Vema-TRANSIT	SO237-4-8	10.427	-31.0733	5735	Atlantic Ocean: North Atlantic	Eastern Vema Fracture Zone	Vema-TRANSIT site A2	Riehl, T., Lins, L. & Brandt, A. The effects of depth, distance, and the Mid-Atlantic Ridge on genetic differentiation of abyssal and hadal isopods (Macrostylidae). Deep Sea Research Part II: Topical Studies in Oceanography.
LT909206	Macrostylidae	Macrostylis	Macrostylis sp. ML08	VTMac052	Vema-TRANSIT	SO237-4-8	10.427	-31.0733	5735	Atlantic Ocean: North Atlantic	Eastern Vema Fracture Zone	Vema-TRANSIT site A2	Riehl, T., Lins, L. & Brandt, A. The effects of depth, distance, and the Mid-Atlantic Ridge on genetic differentiation of abyssal and hadal isopods (Macrostylidae). Deep Sea Research Part II: Topical Studies in Oceanography.
LT909207	Macrostylidae	Macrostylis	Macrostylis sp. ML08	VTMac053	Vema-TRANSIT	SO237-4-8	10.427	-31.0733	5735	Atlantic Ocean: North Atlantic	Eastern Vema Fracture Zone	Vema-TRANSIT site A2	Riehl, T., Lins, L. & Brandt, A. The effects of depth, distance, and the Mid-Atlantic Ridge on genetic differentiation of abyssal and hadal isopods (Macrostylidae). Deep Sea Research Part II: Topical Studies in Oceanography.
LT909208	Macrostylidae	Macrostylis	Macrostylis sp. ML08	VTMac054	Vema-TRANSIT	SO237-4-8	10.427	-31.0733	5735	Atlantic Ocean: North Atlantic	Eastern Vema Fracture Zone	Vema-TRANSIT site A2	Riehl, T., Lins, L. & Brandt, A. The effects of depth, distance, and the Mid-Atlantic Ridge on genetic differentiation of abyssal and hadal isopods (Macrostylidae). Deep Sea Research Part II: Topical Studies in Oceanography.
LT909209	Macrostylidae	Macrostylis	Macrostylis sp. ML08	VTMac055	Vema-TRANSIT	SO237-4-8	10.427	-31.0733	5735	Atlantic Ocean: North Atlantic	Eastern Vema Fracture Zone	Vema-TRANSIT site A2	Riehl, T., Lins, L. & Brandt, A. The effects of depth, distance, and the Mid-Atlantic Ridge on genetic differentiation of abyssal and hadal isopods (Macrostylidae). Deep Sea Research Part II: Topical Studies in Oceanography.
LT909210	Macrostylidae	Macrostylis	Macrostylis sp. ML08	VTMac056	Vema-TRANSIT	SO237-4-8	10.427	-31.0733	5735	Atlantic Ocean: North Atlantic	Eastern Vema Fracture Zone	Vema-TRANSIT site A2	Riehl, T., Lins, L. & Brandt, A. The effects of depth, distance, and the Mid-Atlantic Ridge on genetic differentiation of abyssal and hadal isopods (Macrostylidae). Deep Sea Research Part II: Topical Studies in Oceanography.
LT909211	Macrostylidae	Macrostylis	Macrostylis sp. ML08	VTMac057	Vema-TRANSIT	SO237-4-8	10.427	-31.0733	5735	Atlantic Ocean: North Atlantic	Eastern Vema Fracture Zone	Vema-TRANSIT site A2	Riehl, T., Lins, L. & Brandt, A. The effects of depth, distance, and the Mid-Atlantic Ridge on genetic differentiation of abyssal and hadal isopods (Macrostylidae). Deep Sea Research Part II: Topical Studies in Oceanography.
LT909212	Macrostylidae	Macrostylis	Macrostylis sp. ML08	VTMac058	Vema-TRANSIT	SO237-4-8	10.427	-31.0733	5735	Atlantic Ocean: North Atlantic	Eastern Vema Fracture Zone	Vema-TRANSIT site A2	Riehl, T., Lins, L. & Brandt, A. The effects of depth, distance, and the Mid-Atlantic Ridge on genetic differentiation of abyssal and hadal isopods (Macrostylidae). Deep Sea Research Part II: Topical Studies in Oceanography.
LT909213	Macrostylidae	Macrostylis	Macrostylis sp. ML08	VTMac059	Vema-TRANSIT	SO237-4-8	10.427	-31.0733	5735	Atlantic Ocean: North Atlantic	Eastern Vema Fracture Zone	Vema-TRANSIT site A2	Riehl, T., Lins, L. & Brandt, A. The effects of depth, distance, and the Mid-Atlantic Ridge on genetic differentiation of abyssal and hadal isopods (Macrostylidae). Deep Sea Research Part II: Topical Studies in Oceanography.
LT909214	Macrostylidae	Macrostylis	Macrostylis sp. ML08	VTMac060	Vema-TRANSIT	SO237-4-8	10.427	-31.0733	5735	Atlantic Ocean: North Atlantic	Eastern Vema Fracture Zone	Vema-TRANSIT site A2	Riehl, T., Lins, L. & Brandt, A. The effects of depth, distance, and the Mid-Atlantic Ridge on genetic differentiation of abyssal and hadal isopods (Macrostylidae). Deep Sea Research Part II: Topical Studies in Oceanography.
LT909215	Macrostylidae	Macrostylis	Macrostylis sp. ML08	VTMac061	Vema-TRANSIT	SO237-4-8	10.427	-31.0733	5735	Atlantic Ocean: North Atlantic	Eastern Vema Fracture Zone	Vema-TRANSIT site A2	Riehl, T., Lins, L. & Brandt, A. The effects of depth, distance, and the Mid-Atlantic Ridge on genetic differentiation of abyssal and hadal isopods (Macrostylidae). Deep Sea Research Part II: Topical Studies in Oceanography.
LT909216	Macrostylidae	Macrostylis	Macrostylis sp. ML08	VTMac062	Vema-TRANSIT	SO237-4-8	10.427	-31.0733	5735	Atlantic Ocean: North Atlantic	Eastern Vema Fracture Zone	Vema-TRANSIT site A2	Riehl, T., Lins, L. & Brandt, A. The effects of depth, distance, and the Mid-Atlantic Ridge on genetic differentiation of abyssal and hadal isopods (Macrostylidae). Deep Sea Research Part II: Topical Studies in Oceanography.
LT909217	Macrostylidae	Macrostylis	Macrostylis sp. ML08	VTMac063	Vema-TRANSIT	SO237-4-8	10.427	-31.0733	5735	Atlantic Ocean: North Atlantic	Eastern Vema Fracture Zone	Vema-TRANSIT site A2	Riehl, T., Lins, L. & Brandt, A. The effects of depth, distance, and the Mid-Atlantic Ridge on genetic differentiation of abyssal and hadal isopods (Macrostylidae). Deep Sea Research Part II: Topical Studies in Oceanography.
LT909218	Macrostylidae	Macrostylis	Macrostylis sp. ML08	VTMac064	Vema-TRANSIT	SO237-4-8	10.427	-31.0733	5735	Atlantic Ocean: North Atlantic	Eastern Vema Fracture Zone	Vema-TRANSIT site A2	Riehl, T., Lins, L. & Brandt, A. The effects of depth, distance, and the Mid-Atlantic Ridge on genetic differentiation of abyssal and hadal isopods (Macrostylidae). Deep Sea Research Part II: Topical Studies in Oceanography.
LT909219	Macrostylidae	Macrostylis	Macrostylis sp. ML08	VTMac065	Vema-TRANSIT	SO237-4-8	10.427	-31.0733	5735	Atlantic Ocean: North Atlantic	Eastern Vema Fracture Zone	Vema-TRANSIT site A2	Riehl, T., Lins, L. & Brandt, A. The effects of depth, distance, and the Mid-Atlantic Ridge on genetic differentiation of abyssal and hadal isopods (Macrostylidae). Deep Sea Research Part II: Topical Studies in Oceanography.
LT909220	Macrostylidae	Macrostylis	Macrostylis sp. ML08	VTMac066	Vema-TRANSIT	SO237-4-8	10.427	-31.0733	5735	Atlantic Ocean: North Atlantic	Eastern Vema Fracture Zone	Vema-TRANSIT site A2	Riehl, T., Lins, L. & Brandt, A. The effects of depth, distance, and the Mid-Atlantic Ridge on genetic differentiation of abyssal and hadal isopods (Macrostylidae). Deep Sea Research Part II: Topical Studies in Oceanography.
LT909221	Macrostylidae	Macrostylis	Macrostylis sp. ML08	VTMac067	Vema-TRANSIT	SO237-4-8	10.427	-31.0733	5735	Atlantic Ocean: North Atlantic	Eastern Vema Fracture Zone	Vema-TRANSIT site A2	Riehl, T., Lins, L. & Brandt, A. The effects of depth, distance, and the Mid-Atlantic Ridge on genetic differentiation of abyssal and hadal isopods (Macrostylidae). Deep Sea Research Part II: Topical Studies in Oceanography.
LT909222	Macrostylidae	Macrostylis	Macrostylis sp. ML08	VTMac068	Vema-TRANSIT	SO237-4-8	10.427	-31.0733	5735	Atlantic Ocean: North Atlantic	Eastern Vema Fracture Zone	Vema-TRANSIT site A2	Riehl, T., Lins, L. & Brandt, A. The effects of depth, distance, and the Mid-Atlantic Ridge on genetic differentiation of abyssal and hadal isopods (Macrostylidae). Deep Sea Research Part II: Topical Studies in Oceanography.
LT909223	Macrostylidae	Macrostylis	Macrostylis sp. ML08	VTMac069	Vema-TRANSIT	SO237-4-8	10.427	-31.0733	5735	Atlantic Ocean: North Atlantic	Eastern Vema Fracture Zone	Vema-TRANSIT site A2	Riehl, T., Lins, L. & Brandt, A. The effects of depth, distance, and the Mid-Atlantic Ridge on genetic differentiation of abyssal and hadal isopods (Macrostylidae). Deep Sea Research Part II: Topical Studies in Oceanography.
LT909224	Macrostylidae	Macrostylis	Macrostylis sp. ML08	VTMac070	Vema-TRANSIT	SO237-4-8	10.427	-31.0733	5735	Atlantic Ocean: North Atlantic	Eastern Vema Fracture Zone	Vema-TRANSIT site A2	Riehl, T., Lins, L. & Brandt, A. The effects of depth, distance, and the Mid-Atlantic Ridge on genetic differentiation of abyssal and hadal isopods (Macrostylidae). Deep Sea Research Part II: Topical Studies in Oceanography.
LT909225	Macrostylidae	Macrostylis	Macrostylis sp. ML08	VTMac071	Vema-TRANSIT	SO237-4-8	10.427	-31.0733	5735	Atlantic Ocean: North Atlantic	Eastern Vema Fracture Zone	Vema-TRANSIT site A2	Riehl, T., Lins, L. & Brandt, A. The effects of depth, distance, and the Mid-Atlantic Ridge on genetic differentiation of abyssal and hadal isopods (Macrostylidae). Deep Sea Research Part II: Topical Studies in Oceanography.
LT909226	Macrostylidae	Macrostylis	Macrostylis sp. ML08	VTMac072	Vema-TRANSIT	SO237-4-8	10.427	-31.0733	5735	Atlantic Ocean: North Atlantic	Eastern Vema Fracture Zone	Vema-TRANSIT site A2	Riehl, T., Lins, L. & Brandt, A. The effects of depth, distance, and the Mid-Atlantic Ridge on genetic differentiation of abyssal and hadal isopods (Macrostylidae). Deep Sea Research Part II: Topical Studies in Oceanography.
LT909227	Macrostylidae	Macrostylis	Macrostylis sp. ML08	VTMac073	Vema-TRANSIT	SO237-4-8	10.427	-31.0733	5735	Atlantic Ocean: North Atlantic	Eastern Vema Fracture Zone	Vema-TRANSIT site A2	Riehl, T., Lins, L. & Brandt, A. The effects of depth, distance, and the Mid-Atlantic Ridge on genetic differentiation of abyssal and hadal isopods (Macrostylidae). Deep Sea Research Part II: Topical Studies in Oceanography.
LT909260	Macrostylidae	Macrostylis	Macrostylis sp. ML08	VTMac106	Vema-TRANSIT	SO237-4-8	10.427	-31.0733	5735	Atlantic Ocean: North Atlantic	Eastern Vema Fracture Zone	Vema-TRANSIT site A2	Riehl, T., Lins, L. & Brandt, A. The effects of depth, distance, and the Mid-Atlantic Ridge on genetic differentiation of abyssal and hadal isopods (Macrostylidae). Deep Sea Research Part II: Topical Studies in Oceanography.
LT909261	Macrostylidae	Macrostylis	Macrostylis sp. ML08	VTMac107	Vema-TRANSIT	SO237-4-8	10.427	-31.0733	5735	Atlantic Ocean: North Atlantic	Eastern Vema Fracture Zone	Vema-TRANSIT site A2	Riehl, T., Lins, L. & Brandt, A. The effects of depth, distance, and the Mid-Atlantic Ridge on genetic differentiation of abyssal and hadal isopods (Macrostylidae). Deep Sea Research Part II: Topical Studies in Oceanography.
LT909262	Macrostylidae	Macrostylis	Macrostylis sp. ML08	VTMac108	Vema-TRANSIT	SO237-4-8	10.427	-31.0733	5735	Atlantic Ocean: North Atlantic	Eastern Vema Fracture Zone	Vema-TRANSIT site A2	Riehl, T., Lins, L. & Brandt, A. The effects of depth, distance, and the Mid-Atlantic Ridge on genetic differentiation of abyssal and hadal isopods (Macrostylidae). Deep Sea Research Part II: Topical Studies in Oceanography.
LT909263	Macrostylidae	Macrostylis	Macrostylis sp. ML08	VTMac109	Vema-TRANSIT	SO237-4-8	10.427	-31.0733	5735	Atlantic Ocean: North Atlantic	Eastern Vema Fracture Zone	Vema-TRANSIT site A2	Riehl, T., Lins, L. & Brandt, A. The effects of depth, distance, and the Mid-Atlantic Ridge on genetic differentiation of abyssal and hadal isopods (Macrostylidae). Deep Sea Research Part II: Topical Studies in Oceanography.
LT909264	Macrostylidae	Macrostylis	Macrostylis sp. ML08	VTMac110	Vema-TRANSIT	SO237-4-8	10.427	-31.0733	5735	Atlantic Ocean: North Atlantic	Eastern Vema Fracture Zone	Vema-TRANSIT site A2	Riehl, T., Lins, L. & Brandt, A. The effects of depth, distance, and the Mid-Atlantic Ridge on genetic differentiation of abyssal and hadal isopods (Macrostylidae). Deep Sea Research Part II: Topical Studies in Oceanography.
LT909265	Macrostylidae	Macrostylis	Macrostylis sp. ML08	VTMac111	Vema-TRANSIT	SO237-4-8	10.427	-31.0733	5735	Atlantic Ocean: North Atlantic	Eastern Vema Fracture Zone	Vema-TRANSIT site A2	Riehl, T., Lins, L. & Brandt, A. The effects of depth, distance, and the Mid-Atlantic Ridge on genetic differentiation of abyssal and hadal isopods (Macrostylidae). Deep Sea Research Part II: Topical Studies in Oceanography.
LT909266	Macrostylidae	Macrostylis	Macrostylis sp. ML08	VTMac112	Vema-TRANSIT	SO237-4-8	10.427	-31.0733	5735	Atlantic Ocean: North Atlantic	Eastern Vema Fracture Zone	Vema-TRANSIT site A2	Riehl, T., Lins, L. & Brandt, A. The effects of depth, distance, and the Mid-Atlantic Ridge on genetic differentiation of abyssal and hadal isopods (Macrostylidae). Deep Sea Research Part II: Topical Studies in Oceanography.
LT909267	Macrostylidae	Macrostylis	Macrostylis sp. ML08	VTMac113	Vema-TRANSIT	SO237-4-8	10.427	-31.0733	5735	Atlantic Ocean: North Atlantic	Eastern Vema Fracture Zone	Vema-TRANSIT site A2	Riehl, T., Lins, L. & Brandt, A. The effects of depth, distance, and the Mid-Atlantic Ridge on genetic differentiation of abyssal and hadal isopods (Macrostylidae). Deep Sea Research Part II: Topical Studies in Oceanography.
LT909268	Macrostylidae	Macrostylis	Macrostylis sp. ML08	VTMac114	Vema-TRANSIT	SO237-4-8	10.427	-31.0733	5735	Atlantic Ocean: North Atlantic	Eastern Vema Fracture Zone	Vema-TRANSIT site A2	Riehl, T., Lins, L. & Brandt, A. The effects of depth, distance, and the Mid-Atlantic Ridge on genetic differentiation of abyssal and hadal isopods (Macrostylidae). Deep Sea Research Part II: Topical Studies in Oceanography.
LT909269	Macrostylidae	Macrostylis	Macrostylis sp. ML08	VTMac115	Vema-TRANSIT	SO237-4-8	10.427	-31.0733	5735	Atlantic Ocean: North Atlantic	Eastern Vema Fracture Zone	Vema-TRANSIT site A2	Riehl, T., Lins, L. & Brandt, A. The effects of depth, distance, and the Mid-Atlantic Ridge on genetic differentiation of abyssal and hadal isopods (Macrostylidae). Deep Sea Research Part II: Topical Studies in Oceanography.
LT909274	Macrostylidae	Macrostylis	Macrostylis sp. ML08	VTMac120	Vema-TRANSIT	SO237-4-8	10.427	-31.0733	5735	Atlantic Ocean: North Atlantic	Eastern Vema Fracture Zone	Vema-TRANSIT site A2	Riehl, T., Lins, L. & Brandt, A. The effects of depth, distance, and the Mid-Atlantic Ridge on genetic differentiation of abyssal and hadal isopods (Macrostylidae). Deep Sea Research Part II: Topical Studies in Oceanography.
LT909275	Macrostylidae	Macrostylis	Macrostylis sp. ML08	VTMac121	Vema-TRANSIT	SO237-4-8	10.427	-31.0733	5735	Atlantic Ocean: North Atlantic	Eastern Vema Fracture Zone	Vema-TRANSIT site A2	Riehl, T., Lins, L. & Brandt, A. The effects of depth, distance, and the Mid-Atlantic Ridge on genetic differentiation of abyssal and hadal isopods (Macrostylidae). Deep Sea Research Part II: Topical Studies in Oceanography.
LT909276	Macrostylidae	Macrostylis	Macrostylis sp. ML08	VTMac122	Vema-TRANSIT	SO237-4-8	10.427	-31.0733	5735	Atlantic Ocean: North Atlantic	Eastern Vema Fracture Zone	Vema-TRANSIT site A2	Riehl, T., Lins, L. & Brandt, A. The effects of depth, distance, and the Mid-Atlantic Ridge on genetic differentiation of abyssal and hadal isopods (Macrostylidae). Deep Sea Research Part II: Topical Studies in Oceanography.
LT909277	Macrostylidae	Macrostylis	Macrostylis sp. ML08	VTMac123	Vema-TRANSIT	SO237-4-8	10.427	-31.0733	5735	Atlantic Ocean: North Atlantic	Eastern Vema Fracture Zone	Vema-TRANSIT site A2	Riehl, T., Lins, L. & Brandt, A. The effects of depth, distance, and the Mid-Atlantic Ridge on genetic differentiation of abyssal and hadal isopods (Macrostylidae). Deep Sea Research Part II: Topical Studies in Oceanography.
LT909278	Macrostylidae	Macrostylis	Macrostylis sp. ML08	VTMac125	Vema-TRANSIT	SO237-4-8	10.427	-31.0733	5735	Atlantic Ocean: North Atlantic	Eastern Vema Fracture Zone	Vema-TRANSIT site A2	Riehl, T., Lins, L. & Brandt, A. The effects of depth, distance, and the Mid-Atlantic Ridge on genetic differentiation of abyssal and hadal isopods (Macrostylidae). Deep Sea Research Part II: Topical Studies in Oceanography.
LT909279	Macrostylidae	Macrostylis	Macrostylis sp. ML08	VTMac126	Vema-TRANSIT	SO237-4-8	10.427	-31.0733	5735	Atlantic Ocean: North Atlantic	Eastern Vema Fracture Zone	Vema-TRANSIT site A2	Riehl, T., Lins, L. & Brandt, A. The effects of depth, distance, and the Mid-Atlantic Ridge on genetic differentiation of abyssal and hadal isopods (Macrostylidae). Deep Sea Research Part II: Topical Studies in Oceanography.
LT909280	Macrostylidae	Macrostylis	Macrostylis sp. ML08	VTMac127	Vema-TRANSIT	SO237-4-8	10.427	-31.0733	5735	Atlantic Ocean: North Atlantic	Eastern Vema Fracture Zone	Vema-TRANSIT site A2	Riehl, T., Lins, L. & Brandt, A. The effects of depth, distance, and the Mid-Atlantic Ridge on genetic differentiation of abyssal and hadal isopods (Macrostylidae). Deep Sea Research Part II: Topical Studies in Oceanography.
LT909281	Macrostylidae	Macrostylis	Macrostylis sp. ML08	VTMac128	Vema-TRANSIT	SO237-4-8	10.427	-31.0733	5735	Atlantic Ocean: North Atlantic	Eastern Vema Fracture Zone	Vema-TRANSIT site A2	Riehl, T., Lins, L. & Brandt, A. The effects of depth, distance, and the Mid-Atlantic Ridge on genetic differentiation of abyssal and hadal isopods (Macrostylidae). Deep Sea Research Part II: Topical Studies in Oceanography.
LT909282	Macrostylidae	Macrostylis	Macrostylis sp. ML08	VTMac129	Vema-TRANSIT	SO237-4-8	10.427	-31.0733	5735	Atlantic Ocean: North Atlantic	Eastern Vema Fracture Zone	Vema-TRANSIT site A2	Riehl, T., Lins, L. & Brandt, A. The effects of depth, distance, and the Mid-Atlantic Ridge on genetic differentiation of abyssal and hadal isopods (Macrostylidae). Deep Sea Research Part II: Topical Studies in Oceanography.
LT909283	Macrostylidae	Macrostylis	Macrostylis sp. ML08	VTMac130	Vema-TRANSIT	SO237-4-8	10.427	-31.0733	5735	Atlantic Ocean: North Atlantic	Eastern Vema Fracture Zone	Vema-TRANSIT site A2	Riehl, T., Lins, L. & Brandt, A. The effects of depth, distance, and the Mid-Atlantic Ridge on genetic differentiation of abyssal and hadal isopods (Macrostylidae). Deep Sea Research Part II: Topical Studies in Oceanography.
LT909284	Macrostylidae	Macrostylis	Macrostylis sp. ML08	VTMac131	Vema-TRANSIT	SO237-4-8	10.427	-31.0733	5735	Atlantic Ocean: North Atlantic	Eastern Vema Fracture Zone	Vema-TRANSIT site A2	Riehl, T., Lins, L. & Brandt, A. The effects of depth, distance, and the Mid-Atlantic Ridge on genetic differentiation of abyssal and hadal isopods (Macrostylidae). Deep Sea Research Part II: Topical Studies in Oceanography.
LT909285	Macrostylidae	Macrostylis	Macrostylis sp. ML08	VTMac132	Vema-TRANSIT	SO237-4-8	10.427	-31.0733	5735	Atlantic Ocean: North Atlantic	Eastern Vema Fracture Zone	Vema-TRANSIT site A2	Riehl, T., Lins, L. & Brandt, A. The effects of depth, distance, and the Mid-Atlantic Ridge on genetic differentiation of abyssal and hadal isopods (Macrostylidae). Deep Sea Research Part II: Topical Studies in Oceanography.
LT909350	Macrostylidae	Macrostylis	Macrostylis sp. ML08	VTMac200	Vema-TRANSIT	SO237-4-8	10.427	-31.0733	5735	Atlantic Ocean: North Atlantic	Eastern Vema Fracture Zone	Vema-TRANSIT site A2	Riehl, T., Lins, L. & Brandt, A. The effects of depth, distance, and the Mid-Atlantic Ridge on genetic differentiation of abyssal and hadal isopods (Macrostylidae). Deep Sea Research Part II: Topical Studies in Oceanography.
LT909203	Macrostylidae	Macrostylis	Macrostylis sp. ML08	VTMac049	Vema-TRANSIT	SO237-4-9	10.4275	-31.0497	5735	Atlantic Ocean: North Atlantic	Eastern Vema Fracture Zone	Vema-TRANSIT site A2	Riehl, T., Lins, L. & Brandt, A. The effects of depth, distance, and the Mid-Atlantic Ridge on genetic differentiation of abyssal and hadal isopods (Macrostylidae). Deep Sea Research Part II: Topical Studies in Oceanography.
LT909228	Macrostylidae	Macrostylis	Macrostylis sp. ML08	VTMac074	Vema-TRANSIT	SO237-4-9	10.4275	-31.0497	5735	Atlantic Ocean: North Atlantic	Eastern Vema Fracture Zone	Vema-TRANSIT site A2	Riehl, T., Lins, L. & Brandt, A. The effects of depth, distance, and the Mid-Atlantic Ridge on genetic differentiation of abyssal and hadal isopods (Macrostylidae). Deep Sea Research Part II: Topical Studies in Oceanography.
LT909229	Macrostylidae	Macrostylis	Macrostylis sp. ML08	VTMac075	Vema-TRANSIT	SO237-4-9	10.4275	-31.0497	5735	Atlantic Ocean: North Atlantic	Eastern Vema Fracture Zone	Vema-TRANSIT site A2	Riehl, T., Lins, L. & Brandt, A. The effects of depth, distance, and the Mid-Atlantic Ridge on genetic differentiation of abyssal and hadal isopods (Macrostylidae). Deep Sea Research Part II: Topical Studies in Oceanography.
LT909230	Macrostylidae	Macrostylis	Macrostylis sp. ML08	VTMac076	Vema-TRANSIT	SO237-4-9	10.4275	-31.0497	5735	Atlantic Ocean: North Atlantic	Eastern Vema Fracture Zone	Vema-TRANSIT site A2	Riehl, T., Lins, L. & Brandt, A. The effects of depth, distance, and the Mid-Atlantic Ridge on genetic differentiation of abyssal and hadal isopods (Macrostylidae). Deep Sea Research Part II: Topical Studies in Oceanography.
LT909231	Macrostylidae	Macrostylis	Macrostylis sp. ML08	VTMac077	Vema-TRANSIT	SO237-4-9	10.4275	-31.0497	5735	Atlantic Ocean: North Atlantic	Eastern Vema Fracture Zone	Vema-TRANSIT site A2	Riehl, T., Lins, L. & Brandt, A. The effects of depth, distance, and the Mid-Atlantic Ridge on genetic differentiation of abyssal and hadal isopods (Macrostylidae). Deep Sea Research Part II: Topical Studies in Oceanography.
LT909232	Macrostylidae	Macrostylis	Macrostylis sp. ML08	VTMac078	Vema-TRANSIT	SO237-4-9	10.4275	-31.0497	5735	Atlantic Ocean: North Atlantic	Eastern Vema Fracture Zone	Vema-TRANSIT site A2	Riehl, T., Lins, L. & Brandt, A. The effects of depth, distance, and the Mid-Atlantic Ridge on genetic differentiation of abyssal and hadal isopods (Macrostylidae). Deep Sea Research Part II: Topical Studies in Oceanography.
LT909233	Macrostylidae	Macrostylis	Macrostylis sp. ML08	VTMac079	Vema-TRANSIT	SO237-4-9	10.4275	-31.0497	5735	Atlantic Ocean: North Atlantic	Eastern Vema Fracture Zone	Vema-TRANSIT site A2	Riehl, T., Lins, L. & Brandt, A. The effects of depth, distance, and the Mid-Atlantic Ridge on genetic differentiation of abyssal and hadal isopods (Macrostylidae). Deep Sea Research Part II: Topical Studies in Oceanography.
LT909234	Macrostylidae	Macrostylis	Macrostylis sp. ML08	VTMac080	Vema-TRANSIT	SO237-4-9	10.4275	-31.0497	5735	Atlantic Ocean: North Atlantic	Eastern Vema Fracture Zone	Vema-TRANSIT site A2	Riehl, T., Lins, L. & Brandt, A. The effects of depth, distance, and the Mid-Atlantic Ridge on genetic differentiation of abyssal and hadal isopods (Macrostylidae). Deep Sea Research Part II: Topical Studies in Oceanography.
LT909235	Macrostylidae	Macrostylis	Macrostylis sp. ML08	VTMac081	Vema-TRANSIT	SO237-4-9	10.4275	-31.0497	5735	Atlantic Ocean: North Atlantic	Eastern Vema Fracture Zone	Vema-TRANSIT site A2	Riehl, T., Lins, L. & Brandt, A. The effects of depth, distance, and the Mid-Atlantic Ridge on genetic differentiation of abyssal and hadal isopods (Macrostylidae). Deep Sea Research Part II: Topical Studies in Oceanography.
LT909236	Macrostylidae	Macrostylis	Macrostylis sp. ML08	VTMac082	Vema-TRANSIT	SO237-4-9	10.4275	-31.0497	5735	Atlantic Ocean: North Atlantic	Eastern Vema Fracture Zone	Vema-TRANSIT site A2	Riehl, T., Lins, L. & Brandt, A. The effects of depth, distance, and the Mid-Atlantic Ridge on genetic differentiation of abyssal and hadal isopods (Macrostylidae). Deep Sea Research Part II: Topical Studies in Oceanography.
LT909237	Macrostylidae	Macrostylis	Macrostylis sp. ML08	VTMac083	Vema-TRANSIT	SO237-4-9	10.4275	-31.0497	5735	Atlantic Ocean: North Atlantic	Eastern Vema Fracture Zone	Vema-TRANSIT site A2	Riehl, T., Lins, L. & Brandt, A. The effects of depth, distance, and the Mid-Atlantic Ridge on genetic differentiation of abyssal and hadal isopods (Macrostylidae). Deep Sea Research Part II: Topical Studies in Oceanography.
LT909238	Macrostylidae	Macrostylis	Macrostylis sp. ML08	VTMac084	Vema-TRANSIT	SO237-4-9	10.4275	-31.0497	5735	Atlantic Ocean: North Atlantic	Eastern Vema Fracture Zone	Vema-TRANSIT site A2	Riehl, T., Lins, L. & Brandt, A. The effects of depth, distance, and the Mid-Atlantic Ridge on genetic differentiation of abyssal and hadal isopods (Macrostylidae). Deep Sea Research Part II: Topical Studies in Oceanography.
LT909239	Macrostylidae	Macrostylis	Macrostylis sp. ML08	VTMac085	Vema-TRANSIT	SO237-4-9	10.4275	-31.0497	5735	Atlantic Ocean: North Atlantic	Eastern Vema Fracture Zone	Vema-TRANSIT site A2	Riehl, T., Lins, L. & Brandt, A. The effects of depth, distance, and the Mid-Atlantic Ridge on genetic differentiation of abyssal and hadal isopods (Macrostylidae). Deep Sea Research Part II: Topical Studies in Oceanography.
LT909240	Macrostylidae	Macrostylis	Macrostylis sp. ML08	VTMac086	Vema-TRANSIT	SO237-4-9	10.4275	-31.0497	5735	Atlantic Ocean: North Atlantic	Eastern Vema Fracture Zone	Vema-TRANSIT site A2	Riehl, T., Lins, L. & Brandt, A. The effects of depth, distance, and the Mid-Atlantic Ridge on genetic differentiation of abyssal and hadal isopods (Macrostylidae). Deep Sea Research Part II: Topical Studies in Oceanography.
LT909241	Macrostylidae	Macrostylis	Macrostylis sp. ML08	VTMac087	Vema-TRANSIT	SO237-4-9	10.4275	-31.0497	5735	Atlantic Ocean: North Atlantic	Eastern Vema Fracture Zone	Vema-TRANSIT site A2	Riehl, T., Lins, L. & Brandt, A. The effects of depth, distance, and the Mid-Atlantic Ridge on genetic differentiation of abyssal and hadal isopods (Macrostylidae). Deep Sea Research Part II: Topical Studies in Oceanography.
LT909242	Macrostylidae	Macrostylis	Macrostylis sp. ML08	VTMac088	Vema-TRANSIT	SO237-4-9	10.4275	-31.0497	5735	Atlantic Ocean: North Atlantic	Eastern Vema Fracture Zone	Vema-TRANSIT site A2	Riehl, T., Lins, L. & Brandt, A. The effects of depth, distance, and the Mid-Atlantic Ridge on genetic differentiation of abyssal and hadal isopods (Macrostylidae). Deep Sea Research Part II: Topical Studies in Oceanography.
LT909243	Macrostylidae	Macrostylis	Macrostylis sp. ML08	VTMac089	Vema-TRANSIT	SO237-4-9	10.4275	-31.0497	5735	Atlantic Ocean: North Atlantic	Eastern Vema Fracture Zone	Vema-TRANSIT site A2	Riehl, T., Lins, L. & Brandt, A. The effects of depth, distance, and the Mid-Atlantic Ridge on genetic differentiation of abyssal and hadal isopods (Macrostylidae). Deep Sea Research Part II: Topical Studies in Oceanography.
LT909244	Macrostylidae	Macrostylis	Macrostylis sp. ML08	VTMac090	Vema-TRANSIT	SO237-4-9	10.4275	-31.0497	5735	Atlantic Ocean: North Atlantic	Eastern Vema Fracture Zone	Vema-TRANSIT site A2	Riehl, T., Lins, L. & Brandt, A. The effects of depth, distance, and the Mid-Atlantic Ridge on genetic differentiation of abyssal and hadal isopods (Macrostylidae). Deep Sea Research Part II: Topical Studies in Oceanography.
LT909245	Macrostylidae	Macrostylis	Macrostylis sp. ML08	VTMac091	Vema-TRANSIT	SO237-4-9	10.4275	-31.0497	5735	Atlantic Ocean: North Atlantic	Eastern Vema Fracture Zone	Vema-TRANSIT site A2	Riehl, T., Lins, L. & Brandt, A. The effects of depth, distance, and the Mid-Atlantic Ridge on genetic differentiation of abyssal and hadal isopods (Macrostylidae). Deep Sea Research Part II: Topical Studies in Oceanography.
LT909246	Macrostylidae	Macrostylis	Macrostylis sp. ML08	VTMac092	Vema-TRANSIT	SO237-4-9	10.4275	-31.0497	5735	Atlantic Ocean: North Atlantic	Eastern Vema Fracture Zone	Vema-TRANSIT site A2	Riehl, T., Lins, L. & Brandt, A. The effects of depth, distance, and the Mid-Atlantic Ridge on genetic differentiation of abyssal and hadal isopods (Macrostylidae). Deep Sea Research Part II: Topical Studies in Oceanography.
LT909247	Macrostylidae	Macrostylis	Macrostylis sp. ML08	VTMac093	Vema-TRANSIT	SO237-4-9	10.4275	-31.0497	5735	Atlantic Ocean: North Atlantic	Eastern Vema Fracture Zone	Vema-TRANSIT site A2	Riehl, T., Lins, L. & Brandt, A. The effects of depth, distance, and the Mid-Atlantic Ridge on genetic differentiation of abyssal and hadal isopods (Macrostylidae). Deep Sea Research Part II: Topical Studies in Oceanography.
LT909248	Macrostylidae	Macrostylis	Macrostylis sp. ML08	VTMac094	Vema-TRANSIT	SO237-4-9	10.4275	-31.0497	5735	Atlantic Ocean: North Atlantic	Eastern Vema Fracture Zone	Vema-TRANSIT site A2	Riehl, T., Lins, L. & Brandt, A. The effects of depth, distance, and the Mid-Atlantic Ridge on genetic differentiation of abyssal and hadal isopods (Macrostylidae). Deep Sea Research Part II: Topical Studies in Oceanography.
LT909249	Macrostylidae	Macrostylis	Macrostylis sp. ML08	VTMac095	Vema-TRANSIT	SO237-4-9	10.4275	-31.0497	5735	Atlantic Ocean: North Atlantic	Eastern Vema Fracture Zone	Vema-TRANSIT site A2	Riehl, T., Lins, L. & Brandt, A. The effects of depth, distance, and the Mid-Atlantic Ridge on genetic differentiation of abyssal and hadal isopods (Macrostylidae). Deep Sea Research Part II: Topical Studies in Oceanography.
LT909250	Macrostylidae	Macrostylis	Macrostylis sp. ML08	VTMac096	Vema-TRANSIT	SO237-4-9	10.4275	-31.0497	5735	Atlantic Ocean: North Atlantic	Eastern Vema Fracture Zone	Vema-TRANSIT site A2	Riehl, T., Lins, L. & Brandt, A. The effects of depth, distance, and the Mid-Atlantic Ridge on genetic differentiation of abyssal and hadal isopods (Macrostylidae). Deep Sea Research Part II: Topical Studies in Oceanography.
LT909251	Macrostylidae	Macrostylis	Macrostylis sp. ML08	VTMac097	Vema-TRANSIT	SO237-4-9	10.4275	-31.0497	5735	Atlantic Ocean: North Atlantic	Eastern Vema Fracture Zone	Vema-TRANSIT site A2	Riehl, T., Lins, L. & Brandt, A. The effects of depth, distance, and the Mid-Atlantic Ridge on genetic differentiation of abyssal and hadal isopods (Macrostylidae). Deep Sea Research Part II: Topical Studies in Oceanography.
LT909252	Macrostylidae	Macrostylis	Macrostylis sp. ML08	VTMac098	Vema-TRANSIT	SO237-4-9	10.4275	-31.0497	5735	Atlantic Ocean: North Atlantic	Eastern Vema Fracture Zone	Vema-TRANSIT site A2	Riehl, T., Lins, L. & Brandt, A. The effects of depth, distance, and the Mid-Atlantic Ridge on genetic differentiation of abyssal and hadal isopods (Macrostylidae). Deep Sea Research Part II: Topical Studies in Oceanography.
LT909253	Macrostylidae	Macrostylis	Macrostylis sp. ML08	VTMac099	Vema-TRANSIT	SO237-4-9	10.4275	-31.0497	5735	Atlantic Ocean: North Atlantic	Eastern Vema Fracture Zone	Vema-TRANSIT site A2	Riehl, T., Lins, L. & Brandt, A. The effects of depth, distance, and the Mid-Atlantic Ridge on genetic differentiation of abyssal and hadal isopods (Macrostylidae). Deep Sea Research Part II: Topical Studies in Oceanography.
LT909254	Macrostylidae	Macrostylis	Macrostylis sp. ML08	VTMac100	Vema-TRANSIT	SO237-4-9	10.4275	-31.0497	5735	Atlantic Ocean: North Atlantic	Eastern Vema Fracture Zone	Vema-TRANSIT site A2	Riehl, T., Lins, L. & Brandt, A. The effects of depth, distance, and the Mid-Atlantic Ridge on genetic differentiation of abyssal and hadal isopods (Macrostylidae). Deep Sea Research Part II: Topical Studies in Oceanography.
LT909255	Macrostylidae	Macrostylis	Macrostylis sp. ML08	VTMac101	Vema-TRANSIT	SO237-4-9	10.4275	-31.0497	5735	Atlantic Ocean: North Atlantic	Eastern Vema Fracture Zone	Vema-TRANSIT site A2	Riehl, T., Lins, L. & Brandt, A. The effects of depth, distance, and the Mid-Atlantic Ridge on genetic differentiation of abyssal and hadal isopods (Macrostylidae). Deep Sea Research Part II: Topical Studies in Oceanography.
LT909256	Macrostylidae	Macrostylis	Macrostylis sp. ML08	VTMac102	Vema-TRANSIT	SO237-4-9	10.4275	-31.0497	5735	Atlantic Ocean: North Atlantic	Eastern Vema Fracture Zone	Vema-TRANSIT site A2	Riehl, T., Lins, L. & Brandt, A. The effects of depth, distance, and the Mid-Atlantic Ridge on genetic differentiation of abyssal and hadal isopods (Macrostylidae). Deep Sea Research Part II: Topical Studies in Oceanography.
LT909257	Macrostylidae	Macrostylis	Macrostylis sp. ML08	VTMac103	Vema-TRANSIT	SO237-4-9	10.4275	-31.0497	5735	Atlantic Ocean: North Atlantic	Eastern Vema Fracture Zone	Vema-TRANSIT site A2	Riehl, T., Lins, L. & Brandt, A. The effects of depth, distance, and the Mid-Atlantic Ridge on genetic differentiation of abyssal and hadal isopods (Macrostylidae). Deep Sea Research Part II: Topical Studies in Oceanography.
LT909258	Macrostylidae	Macrostylis	Macrostylis sp. ML08	VTMac104	Vema-TRANSIT	SO237-4-9	10.4275	-31.0497	5735	Atlantic Ocean: North Atlantic	Eastern Vema Fracture Zone	Vema-TRANSIT site A2	Riehl, T., Lins, L. & Brandt, A. The effects of depth, distance, and the Mid-Atlantic Ridge on genetic differentiation of abyssal and hadal isopods (Macrostylidae). Deep Sea Research Part II: Topical Studies in Oceanography.
LT909259	Macrostylidae	Macrostylis	Macrostylis sp. ML03	VTMac105	Vema-TRANSIT	SO237-4-9	10.4275	-31.0497	5735	Atlantic Ocean: North Atlantic	Eastern Vema Fracture Zone	Vema-TRANSIT site A2	Riehl, T., Lins, L. & Brandt, A. The effects of depth, distance, and the Mid-Atlantic Ridge on genetic differentiation of abyssal and hadal isopods (Macrostylidae). Deep Sea Research Part II: Topical Studies in Oceanography.
LT909270	Macrostylidae	Macrostylis	Macrostylis sp. ML08	VTMac116	Vema-TRANSIT	SO237-4-9	10.4275	-31.0497	5735	Atlantic Ocean: North Atlantic	Eastern Vema Fracture Zone	Vema-TRANSIT site A2	Riehl, T., Lins, L. & Brandt, A. The effects of depth, distance, and the Mid-Atlantic Ridge on genetic differentiation of abyssal and hadal isopods (Macrostylidae). Deep Sea Research Part II: Topical Studies in Oceanography.
LT909271	Macrostylidae	Macrostylis	Macrostylis sp. ML08	VTMac117	Vema-TRANSIT	SO237-4-9	10.4275	-31.0497	5735	Atlantic Ocean: North Atlantic	Eastern Vema Fracture Zone	Vema-TRANSIT site A2	Riehl, T., Lins, L. & Brandt, A. The effects of depth, distance, and the Mid-Atlantic Ridge on genetic differentiation of abyssal and hadal isopods (Macrostylidae). Deep Sea Research Part II: Topical Studies in Oceanography.
LT909272	Macrostylidae	Macrostylis	Macrostylis sp. ML08	VTMac118	Vema-TRANSIT	SO237-4-9	10.4275	-31.0497	5735	Atlantic Ocean: North Atlantic	Eastern Vema Fracture Zone	Vema-TRANSIT site A2	Riehl, T., Lins, L. & Brandt, A. The effects of depth, distance, and the Mid-Atlantic Ridge on genetic differentiation of abyssal and hadal isopods (Macrostylidae). Deep Sea Research Part II: Topical Studies in Oceanography.
LT909273	Macrostylidae	Macrostylis	Macrostylis sp. ML08	VTMac119	Vema-TRANSIT	SO237-4-9	10.4275	-31.0497	5735	Atlantic Ocean: North Atlantic	Eastern Vema Fracture Zone	Vema-TRANSIT site A2	Riehl, T., Lins, L. & Brandt, A. The effects of depth, distance, and the Mid-Atlantic Ridge on genetic differentiation of abyssal and hadal isopods (Macrostylidae). Deep Sea Research Part II: Topical Studies in Oceanography.
LT909286	Macrostylidae	Macrostylis	Macrostylis sp. ML08	VTMac133	Vema-TRANSIT	SO237-6-7	10.3637	-36.9177	5085	Atlantic Ocean: North Atlantic	Eastern Vema Fracture Zone	Vema-TRANSIT site A3	Riehl, T., Lins, L. & Brandt, A. The effects of depth, distance, and the Mid-Atlantic Ridge on genetic differentiation of abyssal and hadal isopods (Macrostylidae). Deep Sea Research Part II: Topical Studies in Oceanography.
LT909287	Macrostylidae	Macrostylis	Macrostylis sp. MLpap; Macrostylis papandreas n. sp.	VTMac134	Vema-TRANSIT	SO237-6-7	10.3637	-36.9177	5085	Atlantic Ocean: North Atlantic	Eastern Vema Fracture Zone	Vema-TRANSIT site A3	Riehl, T., Lins, L. & Brandt, A. The effects of depth, distance, and the Mid-Atlantic Ridge on genetic differentiation of abyssal and hadal isopods (Macrostylidae). Deep Sea Research Part II: Topical Studies in Oceanography.
LT909288	Macrostylidae	Macrostylis	Macrostylis sp. ML08	VTMac135	Vema-TRANSIT	SO237-6-7	10.3637	-36.9177	5085	Atlantic Ocean: North Atlantic	Eastern Vema Fracture Zone	Vema-TRANSIT site A3	Riehl, T., Lins, L. & Brandt, A. The effects of depth, distance, and the Mid-Atlantic Ridge on genetic differentiation of abyssal and hadal isopods (Macrostylidae). Deep Sea Research Part II: Topical Studies in Oceanography.
LT909289	Macrostylidae	Macrostylis	Macrostylis sp. ML08	VTMac136	Vema-TRANSIT	SO237-6-7	10.3637	-36.9177	5085	Atlantic Ocean: North Atlantic	Eastern Vema Fracture Zone	Vema-TRANSIT site A3	Riehl, T., Lins, L. & Brandt, A. The effects of depth, distance, and the Mid-Atlantic Ridge on genetic differentiation of abyssal and hadal isopods (Macrostylidae). Deep Sea Research Part II: Topical Studies in Oceanography.
LT909290	Macrostylidae	Macrostylis	Macrostylis sp. MLpap; Macrostylis papandreas n. sp.	VTMac137	Vema-TRANSIT	SO237-6-7	10.3637	-36.9177	5085	Atlantic Ocean: North Atlantic	Eastern Vema Fracture Zone	Vema-TRANSIT site A3	Riehl, T., Lins, L. & Brandt, A. The effects of depth, distance, and the Mid-Atlantic Ridge on genetic differentiation of abyssal and hadal isopods (Macrostylidae). Deep Sea Research Part II: Topical Studies in Oceanography.
LT909291	Macrostylidae	Macrostylis	Macrostylis sp. ML08	VTMac138	Vema-TRANSIT	SO237-6-7	10.3637	-36.9177	5085	Atlantic Ocean: North Atlantic	Eastern Vema Fracture Zone	Vema-TRANSIT site A3	Riehl, T., Lins, L. & Brandt, A. The effects of depth, distance, and the Mid-Atlantic Ridge on genetic differentiation of abyssal and hadal isopods (Macrostylidae). Deep Sea Research Part II: Topical Studies in Oceanography.
LT909292	Macrostylidae	Macrostylis	Macrostylis sp. ML08	VTMac139	Vema-TRANSIT	SO237-6-7	10.3637	-36.9177	5085	Atlantic Ocean: North Atlantic	Eastern Vema Fracture Zone	Vema-TRANSIT site A3	Riehl, T., Lins, L. & Brandt, A. The effects of depth, distance, and the Mid-Atlantic Ridge on genetic differentiation of abyssal and hadal isopods (Macrostylidae). Deep Sea Research Part II: Topical Studies in Oceanography.
LT909293	Macrostylidae	Macrostylis	Macrostylis sp. MLpap; Macrostylis papandreas n. sp.	VTMac140	Vema-TRANSIT	SO237-6-7	10.3637	-36.9177	5085	Atlantic Ocean: North Atlantic	Eastern Vema Fracture Zone	Vema-TRANSIT site A3	Riehl, T., Lins, L. & Brandt, A. The effects of depth, distance, and the Mid-Atlantic Ridge on genetic differentiation of abyssal and hadal isopods (Macrostylidae). Deep Sea Research Part II: Topical Studies in Oceanography.
LT909294	Macrostylidae	Macrostylis	Macrostylis sp. MLpap; Macrostylis papandreas n. sp.	VTMac141	Vema-TRANSIT	SO237-6-7	10.3637	-36.9177	5085	Atlantic Ocean: North Atlantic	Eastern Vema Fracture Zone	Vema-TRANSIT site A3	Riehl, T., Lins, L. & Brandt, A. The effects of depth, distance, and the Mid-Atlantic Ridge on genetic differentiation of abyssal and hadal isopods (Macrostylidae). Deep Sea Research Part II: Topical Studies in Oceanography.
LT909295	Macrostylidae	Macrostylis	Macrostylis sp. ML08	VTMac142	Vema-TRANSIT	SO237-6-7	10.3637	-36.9177	5085	Atlantic Ocean: North Atlantic	Eastern Vema Fracture Zone	Vema-TRANSIT site A3	Riehl, T., Lins, L. & Brandt, A. The effects of depth, distance, and the Mid-Atlantic Ridge on genetic differentiation of abyssal and hadal isopods (Macrostylidae). Deep Sea Research Part II: Topical Studies in Oceanography.
LT909296	Macrostylidae	Macrostylis	Macrostylis sp. ML08	VTMac143	Vema-TRANSIT	SO237-6-7	10.3637	-36.9177	5085	Atlantic Ocean: North Atlantic	Eastern Vema Fracture Zone	Vema-TRANSIT site A3	Riehl, T., Lins, L. & Brandt, A. The effects of depth, distance, and the Mid-Atlantic Ridge on genetic differentiation of abyssal and hadal isopods (Macrostylidae). Deep Sea Research Part II: Topical Studies in Oceanography.
LT909297	Macrostylidae	Macrostylis	Macrostylis sp. ML08	VTMac144	Vema-TRANSIT	SO237-6-7	10.3637	-36.9177	5085	Atlantic Ocean: North Atlantic	Eastern Vema Fracture Zone	Vema-TRANSIT site A3	Riehl, T., Lins, L. & Brandt, A. The effects of depth, distance, and the Mid-Atlantic Ridge on genetic differentiation of abyssal and hadal isopods (Macrostylidae). Deep Sea Research Part II: Topical Studies in Oceanography.
LT909298	Macrostylidae	Macrostylis	Macrostylis sp. MLpap; Macrostylis papandreas n. sp.	VTMac145	Vema-TRANSIT	SO237-6-7	10.3637	-36.9177	5085	Atlantic Ocean: North Atlantic	Eastern Vema Fracture Zone	Vema-TRANSIT site A3	Riehl, T., Lins, L. & Brandt, A. The effects of depth, distance, and the Mid-Atlantic Ridge on genetic differentiation of abyssal and hadal isopods (Macrostylidae). Deep Sea Research Part II: Topical Studies in Oceanography.
LT909299	Macrostylidae	Macrostylis	Macrostylis sp. MLpap; Macrostylis papandreas n. sp.	VTMac147	Vema-TRANSIT	SO237-6-7	10.3637	-36.9177	5085	Atlantic Ocean: North Atlantic	Eastern Vema Fracture Zone	Vema-TRANSIT site A3	Riehl, T., Lins, L. & Brandt, A. The effects of depth, distance, and the Mid-Atlantic Ridge on genetic differentiation of abyssal and hadal isopods (Macrostylidae). Deep Sea Research Part II: Topical Studies in Oceanography.
LT909300	Macrostylidae	Macrostylis	Macrostylis sp. MLpap; Macrostylis papandreas n. sp.	VTMac148	Vema-TRANSIT	SO237-6-7	10.3637	-36.9177	5085	Atlantic Ocean: North Atlantic	Eastern Vema Fracture Zone	Vema-TRANSIT site A3	Riehl, T., Lins, L. & Brandt, A. The effects of depth, distance, and the Mid-Atlantic Ridge on genetic differentiation of abyssal and hadal isopods (Macrostylidae). Deep Sea Research Part II: Topical Studies in Oceanography.
LT909301	Macrostylidae	Macrostylis	Macrostylis sp. MLpap; Macrostylis papandreas n. sp.	VTMac149	Vema-TRANSIT	SO237-6-7	10.3637	-36.9177	5085	Atlantic Ocean: North Atlantic	Eastern Vema Fracture Zone	Vema-TRANSIT site A3	Riehl, T., Lins, L. & Brandt, A. The effects of depth, distance, and the Mid-Atlantic Ridge on genetic differentiation of abyssal and hadal isopods (Macrostylidae). Deep Sea Research Part II: Topical Studies in Oceanography.
LT909302	Macrostylidae	Macrostylis	Macrostylis sp. MLpap; Macrostylis papandreas n. sp.	VTMac150	Vema-TRANSIT	SO237-6-7	10.3637	-36.9177	5085	Atlantic Ocean: North Atlantic	Eastern Vema Fracture Zone	Vema-TRANSIT site A3	Riehl, T., Lins, L. & Brandt, A. The effects of depth, distance, and the Mid-Atlantic Ridge on genetic differentiation of abyssal and hadal isopods (Macrostylidae). Deep Sea Research Part II: Topical Studies in Oceanography.
LT909303	Macrostylidae	Macrostylis	Macrostylis sp. MLpap; Macrostylis papandreas n. sp.	VTMac151	Vema-TRANSIT	SO237-6-7	10.3637	-36.9177	5085	Atlantic Ocean: North Atlantic	Eastern Vema Fracture Zone	Vema-TRANSIT site A3	Riehl, T., Lins, L. & Brandt, A. The effects of depth, distance, and the Mid-Atlantic Ridge on genetic differentiation of abyssal and hadal isopods (Macrostylidae). Deep Sea Research Part II: Topical Studies in Oceanography.
LT909304	Macrostylidae	Macrostylis	Macrostylis sp. ML08	VTMac152	Vema-TRANSIT	SO237-6-7	10.3637	-36.9177	5085	Atlantic Ocean: North Atlantic	Eastern Vema Fracture Zone	Vema-TRANSIT site A3	Riehl, T., Lins, L. & Brandt, A. The effects of depth, distance, and the Mid-Atlantic Ridge on genetic differentiation of abyssal and hadal isopods (Macrostylidae). Deep Sea Research Part II: Topical Studies in Oceanography.
LT909305	Macrostylidae	Macrostylis	Macrostylis sp. ML08	VTMac153	Vema-TRANSIT	SO237-6-7	10.3637	-36.9177	5085	Atlantic Ocean: North Atlantic	Eastern Vema Fracture Zone	Vema-TRANSIT site A3	Riehl, T., Lins, L. & Brandt, A. The effects of depth, distance, and the Mid-Atlantic Ridge on genetic differentiation of abyssal and hadal isopods (Macrostylidae). Deep Sea Research Part II: Topical Studies in Oceanography.
LT909306	Macrostylidae	Macrostylis	Macrostylis sp. ML08	VTMac154	Vema-TRANSIT	SO237-6-7	10.3637	-36.9177	5085	Atlantic Ocean: North Atlantic	Eastern Vema Fracture Zone	Vema-TRANSIT site A3	Riehl, T., Lins, L. & Brandt, A. The effects of depth, distance, and the Mid-Atlantic Ridge on genetic differentiation of abyssal and hadal isopods (Macrostylidae). Deep Sea Research Part II: Topical Studies in Oceanography.
LT909307	Macrostylidae	Macrostylis	Macrostylis sp. ML08	VTMac155	Vema-TRANSIT	SO237-6-7	10.3637	-36.9177	5085	Atlantic Ocean: North Atlantic	Eastern Vema Fracture Zone	Vema-TRANSIT site A3	Riehl, T., Lins, L. & Brandt, A. The effects of depth, distance, and the Mid-Atlantic Ridge on genetic differentiation of abyssal and hadal isopods (Macrostylidae). Deep Sea Research Part II: Topical Studies in Oceanography.
LT909308	Macrostylidae	Macrostylis	Macrostylis sp. MLpap; Macrostylis papandreas n. sp.	VTMac156	Vema-TRANSIT	SO237-6-7	10.3637	-36.9177	5085	Atlantic Ocean: North Atlantic	Eastern Vema Fracture Zone	Vema-TRANSIT site A3	Riehl, T., Lins, L. & Brandt, A. The effects of depth, distance, and the Mid-Atlantic Ridge on genetic differentiation of abyssal and hadal isopods (Macrostylidae). Deep Sea Research Part II: Topical Studies in Oceanography.
LT909309	Macrostylidae	Macrostylis	Macrostylis sp. MLpap; Macrostylis papandreas n. sp.	VTMac157	Vema-TRANSIT	SO237-6-7	10.3637	-36.9177	5085	Atlantic Ocean: North Atlantic	Eastern Vema Fracture Zone	Vema-TRANSIT site A3	Riehl, T., Lins, L. & Brandt, A. The effects of depth, distance, and the Mid-Atlantic Ridge on genetic differentiation of abyssal and hadal isopods (Macrostylidae). Deep Sea Research Part II: Topical Studies in Oceanography.
LT909310	Macrostylidae	Macrostylis	Macrostylis sp. ML08	VTMac158	Vema-TRANSIT	SO237-6-7	10.3637	-36.9177	5085	Atlantic Ocean: North Atlantic	Eastern Vema Fracture Zone	Vema-TRANSIT site A3	Riehl, T., Lins, L. & Brandt, A. The effects of depth, distance, and the Mid-Atlantic Ridge on genetic differentiation of abyssal and hadal isopods (Macrostylidae). Deep Sea Research Part II: Topical Studies in Oceanography.
LT909318	Macrostylidae	Macrostylis	Macrostylis sp. MLpap; Macrostylis papandreas n. sp.	VTMac166	Vema-TRANSIT	SO237-6-7	10.3637	-36.9177	5085	Atlantic Ocean: North Atlantic	Eastern Vema Fracture Zone	Vema-TRANSIT site A3	Riehl, T., Lins, L. & Brandt, A. The effects of depth, distance, and the Mid-Atlantic Ridge on genetic differentiation of abyssal and hadal isopods (Macrostylidae). Deep Sea Research Part II: Topical Studies in Oceanography.
LT909319	Macrostylidae	Macrostylis	Macrostylis sp. MLpap; Macrostylis papandreas n. sp.	VTMac167	Vema-TRANSIT	SO237-6-7	10.3637	-36.9177	5085	Atlantic Ocean: North Atlantic	Eastern Vema Fracture Zone	Vema-TRANSIT site A3	Riehl, T., Lins, L. & Brandt, A. The effects of depth, distance, and the Mid-Atlantic Ridge on genetic differentiation of abyssal and hadal isopods (Macrostylidae). Deep Sea Research Part II: Topical Studies in Oceanography.
LT909320	Macrostylidae	Macrostylis	Macrostylis sp. ML08	VTMac168	Vema-TRANSIT	SO237-6-7	10.3637	-36.9177	5085	Atlantic Ocean: North Atlantic	Eastern Vema Fracture Zone	Vema-TRANSIT site A3	Riehl, T., Lins, L. & Brandt, A. The effects of depth, distance, and the Mid-Atlantic Ridge on genetic differentiation of abyssal and hadal isopods (Macrostylidae). Deep Sea Research Part II: Topical Studies in Oceanography.
LT909311	Macrostylidae	Macrostylis	Macrostylis sp. ML08	VTMac159	Vema-TRANSIT	SO237-6-8	10.3775	-36.9225	5119	Atlantic Ocean: North Atlantic	Eastern Vema Fracture Zone	Vema-TRANSIT site A3	Riehl, T., Lins, L. & Brandt, A. The effects of depth, distance, and the Mid-Atlantic Ridge on genetic differentiation of abyssal and hadal isopods (Macrostylidae). Deep Sea Research Part II: Topical Studies in Oceanography.
LT909312	Macrostylidae	Macrostylis	Macrostylis sp. ML08	VTMac160	Vema-TRANSIT	SO237-6-8	10.3775	-36.9225	5119	Atlantic Ocean: North Atlantic	Eastern Vema Fracture Zone	Vema-TRANSIT site A3	Riehl, T., Lins, L. & Brandt, A. The effects of depth, distance, and the Mid-Atlantic Ridge on genetic differentiation of abyssal and hadal isopods (Macrostylidae). Deep Sea Research Part II: Topical Studies in Oceanography.
LT909313	Macrostylidae	Macrostylis	Macrostylis sp. ML08	VTMac161	Vema-TRANSIT	SO237-6-8	10.3775	-36.9225	5119	Atlantic Ocean: North Atlantic	Eastern Vema Fracture Zone	Vema-TRANSIT site A3	Riehl, T., Lins, L. & Brandt, A. The effects of depth, distance, and the Mid-Atlantic Ridge on genetic differentiation of abyssal and hadal isopods (Macrostylidae). Deep Sea Research Part II: Topical Studies in Oceanography.
LT909314	Macrostylidae	Macrostylis	Macrostylis sp. ML08	VTMac162	Vema-TRANSIT	SO237-6-8	10.3775	-36.9225	5119	Atlantic Ocean: North Atlantic	Eastern Vema Fracture Zone	Vema-TRANSIT site A3	Riehl, T., Lins, L. & Brandt, A. The effects of depth, distance, and the Mid-Atlantic Ridge on genetic differentiation of abyssal and hadal isopods (Macrostylidae). Deep Sea Research Part II: Topical Studies in Oceanography.
LT909315	Macrostylidae	Macrostylis	Macrostylis sp. ML08	VTMac163	Vema-TRANSIT	SO237-6-8	10.3775	-36.9225	5119	Atlantic Ocean: North Atlantic	Eastern Vema Fracture Zone	Vema-TRANSIT site A3	Riehl, T., Lins, L. & Brandt, A. The effects of depth, distance, and the Mid-Atlantic Ridge on genetic differentiation of abyssal and hadal isopods (Macrostylidae). Deep Sea Research Part II: Topical Studies in Oceanography.
LT909316	Macrostylidae	Macrostylis	Macrostylis sp. ML08	VTMac164	Vema-TRANSIT	SO237-6-8	10.3775	-36.9225	5119	Atlantic Ocean: North Atlantic	Eastern Vema Fracture Zone	Vema-TRANSIT site A3	Riehl, T., Lins, L. & Brandt, A. The effects of depth, distance, and the Mid-Atlantic Ridge on genetic differentiation of abyssal and hadal isopods (Macrostylidae). Deep Sea Research Part II: Topical Studies in Oceanography.
LT909317	Macrostylidae	Macrostylis	Macrostylis sp. ML08	VTMac165	Vema-TRANSIT	SO237-6-8	10.3775	-36.9225	5119	Atlantic Ocean: North Atlantic	Eastern Vema Fracture Zone	Vema-TRANSIT site A3	Riehl, T., Lins, L. & Brandt, A. The effects of depth, distance, and the Mid-Atlantic Ridge on genetic differentiation of abyssal and hadal isopods (Macrostylidae). Deep Sea Research Part II: Topical Studies in Oceanography.
LT909321	Macrostylidae	Macrostylis	Macrostylis sp. ML12b	VTMac169	Vema-TRANSIT	SO237-8-4	10.7167	-42.6622	5176	Atlantic Ocean: North Atlantic	Vema Transform Valley	Vema-TRANSIT site A4	Riehl, T., Lins, L. & Brandt, A. The effects of depth, distance, and the Mid-Atlantic Ridge on genetic differentiation of abyssal and hadal isopods (Macrostylidae). Deep Sea Research Part II: Topical Studies in Oceanography.
LT909322	Macrostylidae	Macrostylis	Macrostylis sp. ML12b	VTMac170	Vema-TRANSIT	SO237-8-4	10.7167	-42.6622	5176	Atlantic Ocean: North Atlantic	Vema Transform Valley	Vema-TRANSIT site A4	Riehl, T., Lins, L. & Brandt, A. The effects of depth, distance, and the Mid-Atlantic Ridge on genetic differentiation of abyssal and hadal isopods (Macrostylidae). Deep Sea Research Part II: Topical Studies in Oceanography.
LT909323	Macrostylidae	Macrostylis	Macrostylis sp. ML12b	VTMac171	Vema-TRANSIT	SO237-8-4	10.7167	-42.6622	5176	Atlantic Ocean: North Atlantic	Vema Transform Valley	Vema-TRANSIT site A4	Riehl, T., Lins, L. & Brandt, A. The effects of depth, distance, and the Mid-Atlantic Ridge on genetic differentiation of abyssal and hadal isopods (Macrostylidae). Deep Sea Research Part II: Topical Studies in Oceanography.
LT909324	Macrostylidae	Macrostylis	Macrostylis sp. ML01	VTMac172	Vema-TRANSIT	SO237-8-4	10.7167	-42.6622	5176	Atlantic Ocean: North Atlantic	Vema Transform Valley	Vema-TRANSIT site A4	Riehl, T., Lins, L. & Brandt, A. The effects of depth, distance, and the Mid-Atlantic Ridge on genetic differentiation of abyssal and hadal isopods (Macrostylidae). Deep Sea Research Part II: Topical Studies in Oceanography.
LT909325	Macrostylidae	Macrostylis	Macrostylis sp. ML01	VTMac173	Vema-TRANSIT	SO237-8-4	10.7167	-42.6622	5176	Atlantic Ocean: North Atlantic	Vema Transform Valley	Vema-TRANSIT site A4	Riehl, T., Lins, L. & Brandt, A. The effects of depth, distance, and the Mid-Atlantic Ridge on genetic differentiation of abyssal and hadal isopods (Macrostylidae). Deep Sea Research Part II: Topical Studies in Oceanography.
LT909326	Macrostylidae	Macrostylis	Macrostylis sp. ML01	VTMac174	Vema-TRANSIT	SO237-8-4	10.7167	-42.6622	5176	Atlantic Ocean: North Atlantic	Vema Transform Valley	Vema-TRANSIT site A4	Riehl, T., Lins, L. & Brandt, A. The effects of depth, distance, and the Mid-Atlantic Ridge on genetic differentiation of abyssal and hadal isopods (Macrostylidae). Deep Sea Research Part II: Topical Studies in Oceanography.
LT909327	Macrostylidae	Macrostylis	Macrostylis sp. ML01	VTMac175	Vema-TRANSIT	SO237-8-4	10.7167	-42.6622	5176	Atlantic Ocean: North Atlantic	Vema Transform Valley	Vema-TRANSIT site A4	Riehl, T., Lins, L. & Brandt, A. The effects of depth, distance, and the Mid-Atlantic Ridge on genetic differentiation of abyssal and hadal isopods (Macrostylidae). Deep Sea Research Part II: Topical Studies in Oceanography.
LT909328	Macrostylidae	Macrostylis	Macrostylis sp. ML01	VTMac176	Vema-TRANSIT	SO237-8-4	10.7167	-42.6622	5176	Atlantic Ocean: North Atlantic	Vema Transform Valley	Vema-TRANSIT site A4	Riehl, T., Lins, L. & Brandt, A. The effects of depth, distance, and the Mid-Atlantic Ridge on genetic differentiation of abyssal and hadal isopods (Macrostylidae). Deep Sea Research Part II: Topical Studies in Oceanography.
LT909329	Macrostylidae	Macrostylis	Macrostylis sp. ML01	VTMac178	Vema-TRANSIT	SO237-8-4	10.7167	-42.6622	5176	Atlantic Ocean: North Atlantic	Vema Transform Valley	Vema-TRANSIT site A4	Riehl, T., Lins, L. & Brandt, A. The effects of depth, distance, and the Mid-Atlantic Ridge on genetic differentiation of abyssal and hadal isopods (Macrostylidae). Deep Sea Research Part II: Topical Studies in Oceanography.
LT909330	Macrostylidae	Macrostylis	Macrostylis sp. ML01	VTMac179	Vema-TRANSIT	SO237-8-4	10.7167	-42.6622	5176	Atlantic Ocean: North Atlantic	Vema Transform Valley	Vema-TRANSIT site A4	Riehl, T., Lins, L. & Brandt, A. The effects of depth, distance, and the Mid-Atlantic Ridge on genetic differentiation of abyssal and hadal isopods (Macrostylidae). Deep Sea Research Part II: Topical Studies in Oceanography.
LT909331	Macrostylidae	Macrostylis	Macrostylis sp. ML13	VTMac180	Vema-TRANSIT	SO237-9-8	11.656	-47.8998	5004	Atlantic Ocean: North Atlantic	Western Vema Fracture Zone	Vema-TRANSIT site B1	Riehl, T., Lins, L. & Brandt, A. The effects of depth, distance, and the Mid-Atlantic Ridge on genetic differentiation of abyssal and hadal isopods (Macrostylidae). Deep Sea Research Part II: Topical Studies in Oceanography.
LT909332	Macrostylidae	Macrostylis	Macrostylis sp. ML12	VTMac181	Vema-TRANSIT	SO237-9-8	11.656	-47.8998	5004	Atlantic Ocean: North Atlantic	Western Vema Fracture Zone	Vema-TRANSIT site B1	Riehl, T., Lins, L. & Brandt, A. The effects of depth, distance, and the Mid-Atlantic Ridge on genetic differentiation of abyssal and hadal isopods (Macrostylidae). Deep Sea Research Part II: Topical Studies in Oceanography.
LT909333	Macrostylidae	Macrostylis	Macrostylis sp. MLpap; Macrostylis papandreas n. sp.	VTMac182	Vema-TRANSIT	SO237-9-8	11.656	-47.8998	5004	Atlantic Ocean: North Atlantic	Western Vema Fracture Zone	Vema-TRANSIT site B1	Riehl, T., Lins, L. & Brandt, A. The effects of depth, distance, and the Mid-Atlantic Ridge on genetic differentiation of abyssal and hadal isopods (Macrostylidae). Deep Sea Research Part II: Topical Studies in Oceanography.
LT909334	Macrostylidae	Macrostylis	Macrostylis sp. MLpap; Macrostylis papandreas n. sp.	VTMac183	Vema-TRANSIT	SO237-9-8	11.656	-47.8998	5004	Atlantic Ocean: North Atlantic	Western Vema Fracture Zone	Vema-TRANSIT site B1	Riehl, T., Lins, L. & Brandt, A. The effects of depth, distance, and the Mid-Atlantic Ridge on genetic differentiation of abyssal and hadal isopods (Macrostylidae). Deep Sea Research Part II: Topical Studies in Oceanography.
LT909335	Macrostylidae	Macrostylis	Macrostylis sp. MLpap; Macrostylis papandreas n. sp.	VTMac184	Vema-TRANSIT	SO237-9-8	11.656	-47.8998	5004	Atlantic Ocean: North Atlantic	Western Vema Fracture Zone	Vema-TRANSIT site B1	Riehl, T., Lins, L. & Brandt, A. The effects of depth, distance, and the Mid-Atlantic Ridge on genetic differentiation of abyssal and hadal isopods (Macrostylidae). Deep Sea Research Part II: Topical Studies in Oceanography.
LT909336	Macrostylidae	Macrostylis	Macrostylis sp. ML14	VTMac185	Vema-TRANSIT	SO237-9-8	11.656	-47.8998	5004	Atlantic Ocean: North Atlantic	Western Vema Fracture Zone	Vema-TRANSIT site B1	Riehl, T., Lins, L. & Brandt, A. The effects of depth, distance, and the Mid-Atlantic Ridge on genetic differentiation of abyssal and hadal isopods (Macrostylidae). Deep Sea Research Part II: Topical Studies in Oceanography.
LT909337	Macrostylidae	Macrostylis	Macrostylis sp. MLpap; Macrostylis papandreas n. sp.	VTMac186	Vema-TRANSIT	SO237-9-8	11.656	-47.8998	5004	Atlantic Ocean: North Atlantic	Western Vema Fracture Zone	Vema-TRANSIT site B1	Riehl, T., Lins, L. & Brandt, A. The effects of depth, distance, and the Mid-Atlantic Ridge on genetic differentiation of abyssal and hadal isopods (Macrostylidae). Deep Sea Research Part II: Topical Studies in Oceanography.
LT909343	Macrostylidae	Macrostylis	Macrostylis sp. MLpap; Macrostylis papandreas n. sp.	VTMac192	Vema-TRANSIT	SO237-9-8	11.656	-47.8998	5004	Atlantic Ocean: North Atlantic	Western Vema Fracture Zone	Vema-TRANSIT site B1	Riehl, T., Lins, L. & Brandt, A. The effects of depth, distance, and the Mid-Atlantic Ridge on genetic differentiation of abyssal and hadal isopods (Macrostylidae). Deep Sea Research Part II: Topical Studies in Oceanography.
LT909345	Macrostylidae	Macrostylis	Macrostylis sp. ML12b	VTMac195	Vema-TRANSIT	SO237-9-8	11.656	-47.8998	5004	Atlantic Ocean: North Atlantic	Western Vema Fracture Zone	Vema-TRANSIT site B1	Riehl, T., Lins, L. & Brandt, A. The effects of depth, distance, and the Mid-Atlantic Ridge on genetic differentiation of abyssal and hadal isopods (Macrostylidae). Deep Sea Research Part II: Topical Studies in Oceanography.
LT909338	Macrostylidae	Macrostylis	Macrostylis sp. MLpap; Macrostylis papandreas n. sp.	VTMac187	Vema-TRANSIT	SO237-11-1	12.0973	-50.4662	5093	Atlantic Ocean: North Atlantic	Western Vema Fracture Zone	Vema-TRANSIT site B2	Riehl, T., Lins, L. & Brandt, A. The effects of depth, distance, and the Mid-Atlantic Ridge on genetic differentiation of abyssal and hadal isopods (Macrostylidae). Deep Sea Research Part II: Topical Studies in Oceanography.
LT909339	Macrostylidae	Macrostylis	Macrostylis sp. ML22	VTMac188	Vema-TRANSIT	SO237-11-1	12.0973	-50.4662	5093	Atlantic Ocean: North Atlantic	Western Vema Fracture Zone	Vema-TRANSIT site B2	Riehl, T., Lins, L. & Brandt, A. The effects of depth, distance, and the Mid-Atlantic Ridge on genetic differentiation of abyssal and hadal isopods (Macrostylidae). Deep Sea Research Part II: Topical Studies in Oceanography.
LT909340	Macrostylidae	Macrostylis	Macrostylis sp. MLpap; Macrostylis papandreas n. sp.	VTMac189	Vema-TRANSIT	SO237-11-1	12.0973	-50.4662	5093	Atlantic Ocean: North Atlantic	Western Vema Fracture Zone	Vema-TRANSIT site B2	Riehl, T., Lins, L. & Brandt, A. The effects of depth, distance, and the Mid-Atlantic Ridge on genetic differentiation of abyssal and hadal isopods (Macrostylidae). Deep Sea Research Part II: Topical Studies in Oceanography.
LT909341	Macrostylidae	Macrostylis	Macrostylis sp. MLpap; Macrostylis papandreas n. sp.	VTMac190	Vema-TRANSIT	SO237-11-1	12.0973	-50.4662	5093	Atlantic Ocean: North Atlantic	Western Vema Fracture Zone	Vema-TRANSIT site B2	Riehl, T., Lins, L. & Brandt, A. The effects of depth, distance, and the Mid-Atlantic Ridge on genetic differentiation of abyssal and hadal isopods (Macrostylidae). Deep Sea Research Part II: Topical Studies in Oceanography.
LT909342	Macrostylidae	Macrostylis	Macrostylis sp. ML15	VTMac191	Vema-TRANSIT	SO237-11-1	12.0973	-50.4662	5093	Atlantic Ocean: North Atlantic	Western Vema Fracture Zone	Vema-TRANSIT site B2	Riehl, T., Lins, L. & Brandt, A. The effects of depth, distance, and the Mid-Atlantic Ridge on genetic differentiation of abyssal and hadal isopods (Macrostylidae). Deep Sea Research Part II: Topical Studies in Oceanography.
LT909344	Macrostylidae	Macrostylis	Macrostylis sp. MLpap; Macrostylis papandreas n. sp.	VTMac194	Vema-TRANSIT	SO237-11-4	12.0805	-50.469	5130	Atlantic Ocean: North Atlantic	Western Vema Fracture Zone	Vema-TRANSIT site B2	Riehl, T., Lins, L. & Brandt, A. The effects of depth, distance, and the Mid-Atlantic Ridge on genetic differentiation of abyssal and hadal isopods (Macrostylidae). Deep Sea Research Part II: Topical Studies in Oceanography.
LT909346	Macrostylidae	Macrostylis	Macrostylis sp. ML13	VTMac196	Vema-TRANSIT	SO237-11-4	12.0805	-50.469	5130	Atlantic Ocean: North Atlantic	Western Vema Fracture Zone	Vema-TRANSIT site B2	Riehl, T., Lins, L. & Brandt, A. The effects of depth, distance, and the Mid-Atlantic Ridge on genetic differentiation of abyssal and hadal isopods (Macrostylidae). Deep Sea Research Part II: Topical Studies in Oceanography.
LT909347	Macrostylidae	Macrostylis	Macrostylis sp. MLpap; Macrostylis papandreas n. sp.	VTMac197	Vema-TRANSIT	SO237-11-4	12.0805	-50.469	5130	Atlantic Ocean: North Atlantic	Western Vema Fracture Zone	Vema-TRANSIT site B2	Riehl, T., Lins, L. & Brandt, A. The effects of depth, distance, and the Mid-Atlantic Ridge on genetic differentiation of abyssal and hadal isopods (Macrostylidae). Deep Sea Research Part II: Topical Studies in Oceanography.
LT909348	Macrostylidae	Macrostylis	Macrostylis sp. MLpap; Macrostylis papandreas n. sp.	VTMac198	Vema-TRANSIT	SO237-11-4	12.0805	-50.469	5130	Atlantic Ocean: North Atlantic	Western Vema Fracture Zone	Vema-TRANSIT site B2	Riehl, T., Lins, L. & Brandt, A. The effects of depth, distance, and the Mid-Atlantic Ridge on genetic differentiation of abyssal and hadal isopods (Macrostylidae). Deep Sea Research Part II: Topical Studies in Oceanography.
LT909349	Macrostylidae	Macrostylis	Macrostylis sp. ML08	VTMac199	Vema-TRANSIT	SO237-11-4	12.0805	-50.469	5130	Atlantic Ocean: North Atlantic	Western Vema Fracture Zone	Vema-TRANSIT site B2	Riehl, T., Lins, L. & Brandt, A. The effects of depth, distance, and the Mid-Atlantic Ridge on genetic differentiation of abyssal and hadal isopods (Macrostylidae). Deep Sea Research Part II: Topical Studies in Oceanography.
LT909351	Macrostylidae	Macrostylis	Macrostylis sp. ML12	VTMac201	Vema-TRANSIT	SO237-12-5	19.7808	-66.8337	8339	Atlantic Ocean: North Atlantic	Puerto Rico Trench	Vema-TRANSIT site C1	Riehl, T., Lins, L. & Brandt, A. The effects of depth, distance, and the Mid-Atlantic Ridge on genetic differentiation of abyssal and hadal isopods (Macrostylidae). Deep Sea Research Part II: Topical Studies in Oceanography.
LT909352	Macrostylidae	Macrostylis	Macrostylis marionae n. sp. Kniesz, 2017 (Macrostylis sp. ML25; Macrostylis sp. 1 TR-2017)	VTMac202	Vema-TRANSIT	SO237-12-5	19.7808	-66.8337	8339	Atlantic Ocean: North Atlantic	Puerto Rico Trench	Vema-TRANSIT site C1	Riehl, T., Lins, L. & Brandt, A. The effects of depth, distance, and the Mid-Atlantic Ridge on genetic differentiation of abyssal and hadal isopods (Macrostylidae). Deep Sea Research Part II: Topical Studies in Oceanography.
LT909353	Macrostylidae	Macrostylis	Macrostylis sp. ML12	VTMac204	Vema-TRANSIT	SO237-12-5	19.7808	-66.8337	8339	Atlantic Ocean: North Atlantic	Puerto Rico Trench	Vema-TRANSIT site C1	Riehl, T., Lins, L. & Brandt, A. The effects of depth, distance, and the Mid-Atlantic Ridge on genetic differentiation of abyssal and hadal isopods (Macrostylidae). Deep Sea Research Part II: Topical Studies in Oceanography.
LT909384	Macrostylidae	Macrostylis	Macrostylis sp. ML12	VTMac260	Vema-TRANSIT	SO237-12-5	19.7808	-66.8337	8339	Atlantic Ocean: North Atlantic	Puerto Rico Trench	Vema-TRANSIT site C1	Riehl, T., Lins, L. & Brandt, A. The effects of depth, distance, and the Mid-Atlantic Ridge on genetic differentiation of abyssal and hadal isopods (Macrostylidae). Deep Sea Research Part II: Topical Studies in Oceanography.
LT909354	Macrostylidae	Macrostylis	Macrostylis marionae n. sp. Kniesz, 2017 (Macrostylis sp. ML25; Macrostylis sp. 1 TR-2017)	VTMac205	Vema-TRANSIT	SO237-12-5	19.7808	-66.8337	8339	Atlantic Ocean: North Atlantic	Puerto Rico Trench	Vema-TRANSIT site C1	Riehl, T., Lins, L. & Brandt, A. The effects of depth, distance, and the Mid-Atlantic Ridge on genetic differentiation of abyssal and hadal isopods (Macrostylidae). Deep Sea Research Part II: Topical Studies in Oceanography.
LT909355	Macrostylidae	Macrostylis	Macrostylis marionae n. sp. Kniesz, 2017 (Macrostylis sp. ML25; Macrostylis sp. 1 TR-2017)	VTMac206	Vema-TRANSIT	SO237-12-5	19.7808	-66.8337	8339	Atlantic Ocean: North Atlantic	Puerto Rico Trench	Vema-TRANSIT site C1	Riehl, T., Lins, L. & Brandt, A. The effects of depth, distance, and the Mid-Atlantic Ridge on genetic differentiation of abyssal and hadal isopods (Macrostylidae). Deep Sea Research Part II: Topical Studies in Oceanography.
LT909382	Macrostylidae	Macrostylis	Macrostylis marionae n. sp. Kniesz, 2017 (Macrostylis sp. ML25; Macrostylis sp. 1 TR-2017)	VTMac254	Vema-TRANSIT	SO237-12-5	19.7808	-66.8337	8339	Atlantic Ocean: North Atlantic	Puerto Rico Trench	Vema-TRANSIT site C1	Riehl, T., Lins, L. & Brandt, A. The effects of depth, distance, and the Mid-Atlantic Ridge on genetic differentiation of abyssal and hadal isopods (Macrostylidae). Deep Sea Research Part II: Topical Studies in Oceanography.
LT909385	Macrostylidae	Macrostylis	Macrostylis marionae n. sp. Kniesz, 2017 (Macrostylis sp. ML25; Macrostylis sp. 1 TR-2017)	VTMac262	Vema-TRANSIT	SO237-12-5	19.7808	-66.8337	8339	Atlantic Ocean: North Atlantic	Puerto Rico Trench	Vema-TRANSIT site C1	Riehl, T., Lins, L. & Brandt, A. The effects of depth, distance, and the Mid-Atlantic Ridge on genetic differentiation of abyssal and hadal isopods (Macrostylidae). Deep Sea Research Part II: Topical Studies in Oceanography.
LT909386	Macrostylidae	Macrostylis	Macrostylis marionae n. sp. Kniesz, 2017 (Macrostylis sp. ML25; Macrostylis sp. 1 TR-2017)	VTMac263	Vema-TRANSIT	SO237-12-5	19.7808	-66.8337	8339	Atlantic Ocean: North Atlantic	Puerto Rico Trench	Vema-TRANSIT site C1	Riehl, T., Lins, L. & Brandt, A. The effects of depth, distance, and the Mid-Atlantic Ridge on genetic differentiation of abyssal and hadal isopods (Macrostylidae). Deep Sea Research Part II: Topical Studies in Oceanography.
LT909388	Macrostylidae	Macrostylis	Macrostylis marionae n. sp. Kniesz, 2017 (Macrostylis sp. ML25; Macrostylis sp. 1 TR-2017)	VTMac275	Vema-TRANSIT	SO237-12-5	19.7808	-66.8337	8339	Atlantic Ocean: North Atlantic	Puerto Rico Trench	Vema-TRANSIT site C1	Riehl, T., Lins, L. & Brandt, A. The effects of depth, distance, and the Mid-Atlantic Ridge on genetic differentiation of abyssal and hadal isopods (Macrostylidae). Deep Sea Research Part II: Topical Studies in Oceanography.
LT909389	Macrostylidae	Macrostylis	Macrostylis marionae n. sp. Kniesz, 2017 (Macrostylis sp. ML25; Macrostylis sp. 1 TR-2017)	VTMac276	Vema-TRANSIT	SO237-12-5	19.7808	-66.8337	8339	Atlantic Ocean: North Atlantic	Puerto Rico Trench	Vema-TRANSIT site C1	Riehl, T., Lins, L. & Brandt, A. The effects of depth, distance, and the Mid-Atlantic Ridge on genetic differentiation of abyssal and hadal isopods (Macrostylidae). Deep Sea Research Part II: Topical Studies in Oceanography.
LT909390	Macrostylidae	Macrostylis	Macrostylis marionae n. sp. Kniesz, 2017 (Macrostylis sp. ML25; Macrostylis sp. 1 TR-2017)	VTMac277	Vema-TRANSIT	SO237-12-5	19.7808	-66.8337	8339	Atlantic Ocean: North Atlantic	Puerto Rico Trench	Vema-TRANSIT site C1	Riehl, T., Lins, L. & Brandt, A. The effects of depth, distance, and the Mid-Atlantic Ridge on genetic differentiation of abyssal and hadal isopods (Macrostylidae). Deep Sea Research Part II: Topical Studies in Oceanography.
LT909370	Macrostylidae	Macrostylis	Macrostylis marionae n. sp. Kniesz, 2017 (Macrostylis sp. ML25; Macrostylis sp. 1 TR-2017)	VTMac227	Vema-TRANSIT	SO237-12-6	19.81	-66.7522	8340	Atlantic Ocean: North Atlantic	Puerto Rico Trench	Vema-TRANSIT site C1	Riehl, T., Lins, L. & Brandt, A. The effects of depth, distance, and the Mid-Atlantic Ridge on genetic differentiation of abyssal and hadal isopods (Macrostylidae). Deep Sea Research Part II: Topical Studies in Oceanography.
LT909371	Macrostylidae	Macrostylis	Macrostylis marionae n. sp. Kniesz, 2017 (Macrostylis sp. ML25; Macrostylis sp. 1 TR-2017)	VTMac227	Vema-TRANSIT	SO237-12-6	19.81	-66.7522	8340	Atlantic Ocean: North Atlantic	Puerto Rico Trench	Vema-TRANSIT site C1	Riehl, T., Lins, L. & Brandt, A. The effects of depth, distance, and the Mid-Atlantic Ridge on genetic differentiation of abyssal and hadal isopods (Macrostylidae). Deep Sea Research Part II: Topical Studies in Oceanography.
LT909372	Macrostylidae	Macrostylis	Macrostylis marionae n. sp. Kniesz, 2017 (Macrostylis sp. ML25; Macrostylis sp. 1 TR-2017)	VTMac228	Vema-TRANSIT	SO237-12-6	19.81	-66.7522	8340	Atlantic Ocean: North Atlantic	Puerto Rico Trench	Vema-TRANSIT site C1	Riehl, T., Lins, L. & Brandt, A. The effects of depth, distance, and the Mid-Atlantic Ridge on genetic differentiation of abyssal and hadal isopods (Macrostylidae). Deep Sea Research Part II: Topical Studies in Oceanography.
LT909373	Macrostylidae	Macrostylis	Macrostylis marionae n. sp. Kniesz, 2017 (Macrostylis sp. ML25; Macrostylis sp. 1 TR-2017)	VTMac229	Vema-TRANSIT	SO237-12-6	19.81	-66.7522	8340	Atlantic Ocean: North Atlantic	Puerto Rico Trench	Vema-TRANSIT site C1	Riehl, T., Lins, L. & Brandt, A. The effects of depth, distance, and the Mid-Atlantic Ridge on genetic differentiation of abyssal and hadal isopods (Macrostylidae). Deep Sea Research Part II: Topical Studies in Oceanography.
LT909374	Macrostylidae	Macrostylis	Macrostylis sp. ML12	VTMac232	Vema-TRANSIT	SO237-12-6	19.81	-66.7522	8340	Atlantic Ocean: North Atlantic	Puerto Rico Trench	Vema-TRANSIT site C1	Riehl, T., Lins, L. & Brandt, A. The effects of depth, distance, and the Mid-Atlantic Ridge on genetic differentiation of abyssal and hadal isopods (Macrostylidae). Deep Sea Research Part II: Topical Studies in Oceanography.
LT909381	Macrostylidae	Macrostylis	Macrostylis sp. ML22	VTMac252	Vema-TRANSIT	SO237-12-6	19.81	-66.7522	8340	Atlantic Ocean: North Atlantic	Puerto Rico Trench	Vema-TRANSIT site C1	Riehl, T., Lins, L. & Brandt, A. The effects of depth, distance, and the Mid-Atlantic Ridge on genetic differentiation of abyssal and hadal isopods (Macrostylidae). Deep Sea Research Part II: Topical Studies in Oceanography.
LT909391	Macrostylidae	Macrostylis	Macrostylis marionae n. sp. Kniesz, 2017 (Macrostylis sp. ML25; Macrostylis sp. 1 TR-2017)	VTMac287	Vema-TRANSIT	SO237-12-6	19.81	-66.7522	8340	Atlantic Ocean: North Atlantic	Puerto Rico Trench	Vema-TRANSIT site C1	Riehl, T., Lins, L. & Brandt, A. The effects of depth, distance, and the Mid-Atlantic Ridge on genetic differentiation of abyssal and hadal isopods (Macrostylidae). Deep Sea Research Part II: Topical Studies in Oceanography.
LT909356	Macrostylidae	Macrostylis	Macrostylis marionae n. sp. Kniesz, 2017 (Macrostylis sp. ML25; Macrostylis sp. 1 TR-2017)	VTMac208	Vema-TRANSIT	SO237-13-4	19.702	-67.0965	8329	Atlantic Ocean: North Atlantic	Puerto Rico Trench	Vema-TRANSIT site C2	Riehl, T., Lins, L. & Brandt, A. The effects of depth, distance, and the Mid-Atlantic Ridge on genetic differentiation of abyssal and hadal isopods (Macrostylidae). Deep Sea Research Part II: Topical Studies in Oceanography.
LT909357	Macrostylidae	Macrostylis	Macrostylis sp. ML24	VTMac209	Vema-TRANSIT	SO237-13-4	19.702	-67.0965	8329	Atlantic Ocean: North Atlantic	Puerto Rico Trench	Vema-TRANSIT site C2	Riehl, T., Lins, L. & Brandt, A. The effects of depth, distance, and the Mid-Atlantic Ridge on genetic differentiation of abyssal and hadal isopods (Macrostylidae). Deep Sea Research Part II: Topical Studies in Oceanography.
LT909358	Macrostylidae	Macrostylis	Macrostylis marionae n. sp. Kniesz, 2017 (Macrostylis sp. ML25; Macrostylis sp. 1 TR-2017)	VTMac210	Vema-TRANSIT	SO237-13-4	19.702	-67.0965	8329	Atlantic Ocean: North Atlantic	Puerto Rico Trench	Vema-TRANSIT site C2	Riehl, T., Lins, L. & Brandt, A. The effects of depth, distance, and the Mid-Atlantic Ridge on genetic differentiation of abyssal and hadal isopods (Macrostylidae). Deep Sea Research Part II: Topical Studies in Oceanography.
LT909359	Macrostylidae	Macrostylis	Macrostylis sp. ML23	VTMac211	Vema-TRANSIT	SO237-13-4	19.702	-67.0965	8329	Atlantic Ocean: North Atlantic	Puerto Rico Trench	Vema-TRANSIT site C2	Riehl, T., Lins, L. & Brandt, A. The effects of depth, distance, and the Mid-Atlantic Ridge on genetic differentiation of abyssal and hadal isopods (Macrostylidae). Deep Sea Research Part II: Topical Studies in Oceanography.
LT909360	Macrostylidae	Macrostylis	Macrostylis marionae n. sp. Kniesz, 2017 (Macrostylis sp. ML25; Macrostylis sp. 1 TR-2017)	VTMac212	Vema-TRANSIT	SO237-13-4	19.702	-67.0965	8329	Atlantic Ocean: North Atlantic	Puerto Rico Trench	Vema-TRANSIT site C2	Riehl, T., Lins, L. & Brandt, A. The effects of depth, distance, and the Mid-Atlantic Ridge on genetic differentiation of abyssal and hadal isopods (Macrostylidae). Deep Sea Research Part II: Topical Studies in Oceanography.
LT909361	Macrostylidae	Macrostylis	Macrostylis marionae n. sp. Kniesz, 2017 (Macrostylis sp. ML25; Macrostylis sp. 1 TR-2017)	VTMac213	Vema-TRANSIT	SO237-13-4	19.702	-67.0965	8329	Atlantic Ocean: North Atlantic	Puerto Rico Trench	Vema-TRANSIT site C2	Riehl, T., Lins, L. & Brandt, A. The effects of depth, distance, and the Mid-Atlantic Ridge on genetic differentiation of abyssal and hadal isopods (Macrostylidae). Deep Sea Research Part II: Topical Studies in Oceanography.
LT909362	Macrostylidae	Macrostylis	Macrostylis marionae n. sp. Kniesz, 2017 (Macrostylis sp. ML25; Macrostylis sp. 1 TR-2017)	VTMac215	Vema-TRANSIT	SO237-13-4	19.702	-67.0965	8329	Atlantic Ocean: North Atlantic	Puerto Rico Trench	Vema-TRANSIT site C2	Riehl, T., Lins, L. & Brandt, A. The effects of depth, distance, and the Mid-Atlantic Ridge on genetic differentiation of abyssal and hadal isopods (Macrostylidae). Deep Sea Research Part II: Topical Studies in Oceanography.
LT909363	Macrostylidae	Macrostylis	Macrostylis marionae n. sp. Kniesz, 2017 (Macrostylis sp. ML25; Macrostylis sp. 1 TR-2017)	VTMac216	Vema-TRANSIT	SO237-13-4	19.702	-67.0965	8329	Atlantic Ocean: North Atlantic	Puerto Rico Trench	Vema-TRANSIT site C2	Riehl, T., Lins, L. & Brandt, A. The effects of depth, distance, and the Mid-Atlantic Ridge on genetic differentiation of abyssal and hadal isopods (Macrostylidae). Deep Sea Research Part II: Topical Studies in Oceanography.
LT909364	Macrostylidae	Macrostylis	Macrostylis marionae n. sp. Kniesz, 2017 (Macrostylis sp. ML25; Macrostylis sp. 1 TR-2017)	VTMac217	Vema-TRANSIT	SO237-13-4	19.702	-67.0965	8329	Atlantic Ocean: North Atlantic	Puerto Rico Trench	Vema-TRANSIT site C2	Riehl, T., Lins, L. & Brandt, A. The effects of depth, distance, and the Mid-Atlantic Ridge on genetic differentiation of abyssal and hadal isopods (Macrostylidae). Deep Sea Research Part II: Topical Studies in Oceanography.
LT909365	Macrostylidae	Macrostylis	Macrostylis marionae n. sp. Kniesz, 2017 (Macrostylis sp. ML25; Macrostylis sp. 1 TR-2017)	VTMac218	Vema-TRANSIT	SO237-13-4	19.702	-67.0965	8329	Atlantic Ocean: North Atlantic	Puerto Rico Trench	Vema-TRANSIT site C2	Riehl, T., Lins, L. & Brandt, A. The effects of depth, distance, and the Mid-Atlantic Ridge on genetic differentiation of abyssal and hadal isopods (Macrostylidae). Deep Sea Research Part II: Topical Studies in Oceanography.
LT909366	Macrostylidae	Macrostylis	Macrostylis marionae n. sp. Kniesz, 2017 (Macrostylis sp. ML25; Macrostylis sp. 1 TR-2017)	VTMac220	Vema-TRANSIT	SO237-13-4	19.702	-67.0965	8329	Atlantic Ocean: North Atlantic	Puerto Rico Trench	Vema-TRANSIT site C2	Riehl, T., Lins, L. & Brandt, A. The effects of depth, distance, and the Mid-Atlantic Ridge on genetic differentiation of abyssal and hadal isopods (Macrostylidae). Deep Sea Research Part II: Topical Studies in Oceanography.
LT909367	Macrostylidae	Macrostylis	Macrostylis marionae n. sp. Kniesz, 2017 (Macrostylis sp. ML25; Macrostylis sp. 1 TR-2017)	VTMac221	Vema-TRANSIT	SO237-13-4	19.702	-67.0965	8329	Atlantic Ocean: North Atlantic	Puerto Rico Trench	Vema-TRANSIT site C2	Riehl, T., Lins, L. & Brandt, A. The effects of depth, distance, and the Mid-Atlantic Ridge on genetic differentiation of abyssal and hadal isopods (Macrostylidae). Deep Sea Research Part II: Topical Studies in Oceanography.
LT909368	Macrostylidae	Macrostylis	Macrostylis sp. ML22	VTMac223	Vema-TRANSIT	SO237-13-4	19.702	-67.0965	8329	Atlantic Ocean: North Atlantic	Puerto Rico Trench	Vema-TRANSIT site C2	Riehl, T., Lins, L. & Brandt, A. The effects of depth, distance, and the Mid-Atlantic Ridge on genetic differentiation of abyssal and hadal isopods (Macrostylidae). Deep Sea Research Part II: Topical Studies in Oceanography.
LT909369	Macrostylidae	Macrostylis	Macrostylis marionae n. sp. Kniesz, 2017 (Macrostylis sp. ML25; Macrostylis sp. 1 TR-2017)	VTMac224	Vema-TRANSIT	SO237-13-4	19.702	-67.0965	8329	Atlantic Ocean: North Atlantic	Puerto Rico Trench	Vema-TRANSIT site C2	Riehl, T., Lins, L. & Brandt, A. The effects of depth, distance, and the Mid-Atlantic Ridge on genetic differentiation of abyssal and hadal isopods (Macrostylidae). Deep Sea Research Part II: Topical Studies in Oceanography.
LT909375	Macrostylidae	Macrostylis	Macrostylis sp. ML12	VTMac240	Vema-TRANSIT	SO237-13-4	19.702	-67.0965	8329	Atlantic Ocean: North Atlantic	Puerto Rico Trench	Vema-TRANSIT site C2	Riehl, T., Lins, L. & Brandt, A. The effects of depth, distance, and the Mid-Atlantic Ridge on genetic differentiation of abyssal and hadal isopods (Macrostylidae). Deep Sea Research Part II: Topical Studies in Oceanography.
LT909376	Macrostylidae	Macrostylis	Macrostylis marionae n. sp. Kniesz, 2017 (Macrostylis sp. ML25; Macrostylis sp. 1 TR-2017)	VTMac243	Vema-TRANSIT	SO237-13-4	19.702	-67.0965	8329	Atlantic Ocean: North Atlantic	Puerto Rico Trench	Vema-TRANSIT site C2	Riehl, T., Lins, L. & Brandt, A. The effects of depth, distance, and the Mid-Atlantic Ridge on genetic differentiation of abyssal and hadal isopods (Macrostylidae). Deep Sea Research Part II: Topical Studies in Oceanography.
LT909377	Macrostylidae	Macrostylis	Macrostylis sp. ML15b	VTMac244	Vema-TRANSIT	SO237-13-4	19.702	-67.0965	8329	Atlantic Ocean: North Atlantic	Puerto Rico Trench	Vema-TRANSIT site C2	Riehl, T., Lins, L. & Brandt, A. The effects of depth, distance, and the Mid-Atlantic Ridge on genetic differentiation of abyssal and hadal isopods (Macrostylidae). Deep Sea Research Part II: Topical Studies in Oceanography.
LT909378	Macrostylidae	Macrostylis	Macrostylis marionae n. sp. Kniesz, 2017 (Macrostylis sp. ML25; Macrostylis sp. 1 TR-2017)	VTMac247	Vema-TRANSIT	SO237-13-4	19.702	-67.0965	8329	Atlantic Ocean: North Atlantic	Puerto Rico Trench	Vema-TRANSIT site C2	Riehl, T., Lins, L. & Brandt, A. The effects of depth, distance, and the Mid-Atlantic Ridge on genetic differentiation of abyssal and hadal isopods (Macrostylidae). Deep Sea Research Part II: Topical Studies in Oceanography.
LT909379	Macrostylidae	Macrostylis	Macrostylis marionae n. sp. Kniesz, 2017 (Macrostylis sp. ML25; Macrostylis sp. 1 TR-2017)	VTMac248	Vema-TRANSIT	SO237-13-4	19.702	-67.0965	8329	Atlantic Ocean: North Atlantic	Puerto Rico Trench	Vema-TRANSIT site C2	Riehl, T., Lins, L. & Brandt, A. The effects of depth, distance, and the Mid-Atlantic Ridge on genetic differentiation of abyssal and hadal isopods (Macrostylidae). Deep Sea Research Part II: Topical Studies in Oceanography.
LT909380	Macrostylidae	Macrostylis	Macrostylis marionae n. sp. Kniesz, 2017 (Macrostylis sp. ML25; Macrostylis sp. 1 TR-2017)	VTMac249	Vema-TRANSIT	SO237-13-4	19.702	-67.0965	8329	Atlantic Ocean: North Atlantic	Puerto Rico Trench	Vema-TRANSIT site C2	Riehl, T., Lins, L. & Brandt, A. The effects of depth, distance, and the Mid-Atlantic Ridge on genetic differentiation of abyssal and hadal isopods (Macrostylidae). Deep Sea Research Part II: Topical Studies in Oceanography.
LT909392	Macrostylidae	Macrostylis	Macrostylis marionae n. sp. Kniesz, 2017 (Macrostylis sp. ML25; Macrostylis sp. 1 TR-2017)	VTMac300	Vema-TRANSIT	SO237-13-4	19.702	-67.0965	8329	Atlantic Ocean: North Atlantic	Puerto Rico Trench	Vema-TRANSIT site C2	Riehl, T., Lins, L. & Brandt, A. The effects of depth, distance, and the Mid-Atlantic Ridge on genetic differentiation of abyssal and hadal isopods (Macrostylidae). Deep Sea Research Part II: Topical Studies in Oceanography.
LT909383	Macrostylidae	Macrostylis	Macrostylis marionae n. sp. Kniesz, 2017 (Macrostylis sp. ML25; Macrostylis sp. 1 TR-2017)	VTMac255	Vema-TRANSIT	SO237-13-5	19.8353	-67.0436	8082	Atlantic Ocean: North Atlantic	Puerto Rico Trench	Vema-TRANSIT site C2	Riehl, T., Lins, L. & Brandt, A. The effects of depth, distance, and the Mid-Atlantic Ridge on genetic differentiation of abyssal and hadal isopods (Macrostylidae). Deep Sea Research Part II: Topical Studies in Oceanography.
LT909387	Macrostylidae	Macrostylis	Macrostylis marionae n. sp. Kniesz, 2017 (Macrostylis sp. ML25; Macrostylis sp. 1 TR-2017)	VTMac270	Vema-TRANSIT	SO237-13-5	19.8353	-67.0436	8082	Atlantic Ocean: North Atlantic	Puerto Rico Trench	Vema-TRANSIT site C2	Riehl, T., Lins, L. & Brandt, A. The effects of depth, distance, and the Mid-Atlantic Ridge on genetic differentiation of abyssal and hadal isopods (Macrostylidae). Deep Sea Research Part II: Topical Studies in Oceanography.
LT909393	Macrostylidae	Macrostylis	Macrostylis sp. ML16	VTMac318	Vema-TRANSIT	SO237-14-2	19.0778	-67.1295	4930	Atlantic Ocean: North Atlantic	Puerto Rico Trench	Vema-TRANSIT site C3	Riehl, T., Lins, L. & Brandt, A. The effects of depth, distance, and the Mid-Atlantic Ridge on genetic differentiation of abyssal and hadal isopods (Macrostylidae). Deep Sea Research Part II: Topical Studies in Oceanography.
LT909394	Macrostylidae	Macrostylis	Macrostylis sp. ML16	VTMac321	Vema-TRANSIT	SO237-14-2	19.0778	-67.1295	4930	Atlantic Ocean: North Atlantic	Puerto Rico Trench	Vema-TRANSIT site C3	Riehl, T., Lins, L. & Brandt, A. The effects of depth, distance, and the Mid-Atlantic Ridge on genetic differentiation of abyssal and hadal isopods (Macrostylidae). Deep Sea Research Part II: Topical Studies in Oceanography.
LT909395	Macrostylidae	Macrostylis	Macrostylis sp. ML16	VTMac322	Vema-TRANSIT	SO237-14-2	19.0778	-67.1295	4930	Atlantic Ocean: North Atlantic	Puerto Rico Trench	Vema-TRANSIT site C3	Riehl, T., Lins, L. & Brandt, A. The effects of depth, distance, and the Mid-Atlantic Ridge on genetic differentiation of abyssal and hadal isopods (Macrostylidae). Deep Sea Research Part II: Topical Studies in Oceanography.
